# Supplementary material for: Unraveling Differences in Fecal Microbiota Stability in Mammals: From High Variable Carnivores and Consistently Stable Herbivores
Source: Research Square preprint supplement (doi:10.21203/rs.3.rs-473663/v1), 2021-05-06
Supplement: Supplementary file 1 [file 0741aa642f8b84f74ac3b728.xlsx]

## Sheet: Statistic_alpha_diversity
Measurement	Richness
Test	Kruskal-Wallis rank sum test			Dunn (post-hoc)
Result	Kruskal-Wallis chi-squared	431.84		Comparison	Z	p.unadj	p.adj
	df	3		Canoidea-Feloidea	0.367	0.714	1
	p-value	<0.001		Canoidea-Perissodactyla	-14.47	<0.001	<0.001
				Feloidea-Perissodactyla	-14.823	<0.001	<0.001
				Canoidea-Ruminantia	-14.527	<0.001	<0.001
				Feloidea-Ruminantia	-14.912	<0.001	<0.001
				Perissodactyla-Ruminantia	0.943	0.345	1
Measurement	Shannon Index			Dunn (post-hoc)
Test	Kruskal-Wallis rank sum test			Comparison	Z	p.unadj	p.adj
Result	Kruskal-Wallis chi-squared	425.99		Canoidea-Feloidea	-0.72	0.471	1
	df	3		Canoidea-Perissodactyla	-14.67	<0.001	<0.001
	p-value	<0.001		Feloidea-Perissodactyla	-14.128	<0.001	<0.001
				Canoidea-Ruminantia	-15.042	<0.001	<0.001
				Feloidea-Ruminantia	-14.433	<0.001	<0.001
				Perissodactyla-Ruminantia	0.709	0.478	1
Measurement	ENS			Dunn (post-hoc)
Test	Kruskal-Wallis rank sum test	425.99		Comparison	Z	p.unadj	p.adj
Result	Kruskal-Wallis chi-squared	3		Canoidea-Feloidea	-0.72	0.471	1
	df	<0.001		Canoidea-Perissodactyla	-14.698	<0.001	<0.001
	p-value			Feloidea-Perissodactyla	-14.128	<0.001	<0.001
				Canoidea-Ruminantia	-15.042	<0.001	<0.001
				Feloidea-Ruminantia	-14.433	<0.001	<0.001
				Perissodactyla-Ruminantia	4.782	0.478	1
