# Supplementary material for: Unraveling Differences in Fecal Microbiota Stability in Mammals: From High Variable Carnivores and Consistently Stable Herbivores
Source: Research Square preprint supplement (doi:10.21203/rs.3.rs-473663/v1), 2021-05-06
Supplement: Supplementary file 2 [file 22faa68f0c50665d24ef9086.xlsx]

## Sheet: Sample_metadata
Sample_ID	accession	organism	collection_date	env_broad_scale	env_local_scale	env_medium	geo_loc_name	host	lat_lon	host_group	host_diet_type	Faith_pd	Shannon_entropy	Richness	Effective_number_of_species
BER0403PAND	PRJNA716130	feces metagenome	43894	fecal microbiome	fecal	fecal	Germany: Berlin	Ailurus fulgens	52.50 N 13.53 E	Canoidea	Carnivore	6.41512	3.397	58	29.8742
BER0503PAND	PRJNA716130	feces metagenome	43895	fecal microbiome	fecal	fecal	Germany: Berlin	Ailurus fulgens	52.50 N 13.53 E	Canoidea	Carnivore	14.155	5.2452	90	11.925
BER0805PAND1	PRJNA716130	feces metagenome	43228	fecal microbiome	fecal	fecal	Germany: Berlin	Ailurus fulgens	52.50 N 13.53 E	Canoidea	Carnivore	14.0289	5.4292	108	119.372
BER0805PAND2	PRJNA716130	feces metagenome	43228	fecal microbiome	fecal	fecal	Germany: Berlin	Ailurus fulgens	52.50 N 13.53 E	Canoidea	Carnivore	11.4425	5.31962	67	27.3884
BER1505PAND3	PRJNA716130	feces metagenome	43235	fecal microbiome	fecal	fecal	Germany: Berlin	Ailurus fulgens	52.50 N 13.53 E	Canoidea	Carnivore	12.985	5.72877	94	111.155
BER1505PAND4	PRJNA716130	feces metagenome	43235	fecal microbiome	fecal	fecal	Germany: Berlin	Ailurus fulgens	52.50 N 13.53 E	Canoidea	Carnivore	13.8828	5.20176	80	115.734
DOR0606PAND1	PRJNA716130	feces metagenome	43257	fecal microbiome	fecal	fecal	Germany: Dortmund	Ailurus fulgens	51.47 N 7.47 E	Canoidea	Carnivore	11.723	5.16163	72	62.481
DOR0606PAND2	PRJNA716130	feces metagenome	43257	fecal microbiome	fecal	fecal	Germany: Dortmund	Ailurus fulgens	51.47 N 7.47 E	Canoidea	Carnivore	10.1301	4.90967	49	72.5318
DOR1306PAND3	PRJNA716130	feces metagenome	43264	fecal microbiome	fecal	fecal	Germany: Dortmund	Ailurus fulgens	51.47 N 7.47 E	Canoidea	Carnivore	14.6886	5.58101	105	51.7349
DOR1306PAND4	PRJNA716130	feces metagenome	43264	fecal microbiome	fecal	fecal	Germany: Dortmund	Ailurus fulgens	51.47 N 7.47 E	Canoidea	Carnivore	15.2335	5.43312	102	334.983
DUI0406PAND1	PRJNA716130	feces metagenome	43255	fecal microbiome	fecal	fecal	Germany: Duisburg	Ailurus fulgens	51.44 N 6.80 E	Canoidea	Carnivore	9.44959	4.34943	57	19.7187
DUI0406PAND2	PRJNA716130	feces metagenome	43255	fecal microbiome	fecal	fecal	Germany: Duisburg	Ailurus fulgens	51.44 N 6.80 E	Canoidea	Carnivore	8.71928	5.10096	53	24.7269
DUI1106PAND3	PRJNA716130	feces metagenome	43384	fecal microbiome	fecal	fecal	Germany: Duisburg	Ailurus fulgens	51.44 N 6.80 E	Canoidea	Carnivore	13.3043	5.12782	81	6.72129
DUI1106PAND4	PRJNA716130	feces metagenome	43384	fecal microbiome	fecal	fecal	Germany: Duisburg	Ailurus fulgens	51.44 N 6.80 E	Canoidea	Carnivore	14.7401	5.58496	94	33.8546
KRE0706PAND1	PRJNA716130	feces metagenome	43258	fecal microbiome	fecal	fecal	Germany: Krefeld	Ailurus fulgens	51.36 N 6.63 E	Canoidea	Carnivore	7.7888	4.51119	39	37.756
KRE0706PAND2	PRJNA716130	feces metagenome	43258	fecal microbiome	fecal	fecal	Germany: Krefeld	Ailurus fulgens	51.36 N 6.63 E	Canoidea	Carnivore	13.0627	5.06796	83	46.8945
KRE0706PAND3	PRJNA716130	feces metagenome	43258	fecal microbiome	fecal	fecal	Germany: Krefeld	Ailurus fulgens	51.36 N 6.63 E	Canoidea	Carnivore	13.0332	5.36041	92	97.4855
KRE1406PAND4	PRJNA716130	feces metagenome	43265	fecal microbiome	fecal	fecal	Germany: Krefeld	Ailurus fulgens	51.36 N 6.63 E	Canoidea	Carnivore	10.7458	5.46906	73	63.2059
MUE2008PAND1	PRJNA716130	feces metagenome	43332	fecal microbiome	fecal	fecal	Germany: Munich	Ailurus fulgens	48.10 N 11.55 E	Canoidea	Carnivore	11.8984	5.40307	87	5.17921
MUE2008PAND2	PRJNA716130	feces metagenome	43332	fecal microbiome	fecal	fecal	Germany: Munich	Ailurus fulgens	48.10 N 11.55 E	Canoidea	Carnivore	16.7843	5.80994	84	85.251
MUE2709PAND3	PRJNA716130	feces metagenome	43370	fecal microbiome	fecal	fecal	Germany: Munich	Ailurus fulgens	48.10 N 11.55 E	Canoidea	Carnivore	8.23953	3.6813	52	13.7235
NEU0405PAND1	PRJNA716130	feces metagenome	43224	fecal microbiome	fecal	fecal	Germany: Neuwied	Ailurus fulgens	50.45 N 7.57 E	Canoidea	Carnivore	15.513	4.77939	92	22.1159
NEU0405PAND2	PRJNA716130	feces metagenome	43224	fecal microbiome	fecal	fecal	Germany: Neuwied	Ailurus fulgens	50.45 N 7.57 E	Canoidea	Carnivore	16.4641	5.47146	116	79.2601
NEU2704PAND3	PRJNA716130	feces metagenome	43217	fecal microbiome	fecal	fecal	Germany: Neuwied	Ailurus fulgens	50.45 N 7.57 E	Canoidea	Carnivore	10.2006	4.08347	68	41.8106
OPE1807PAND1	PRJNA716130	feces metagenome	43299	fecal microbiome	fecal	fecal	Germany: Kronberg	Ailurus fulgens	50.18 N 8.49 E	Canoidea	Carnivore	15.5335	5.40022	102	50.2568
OPE1807PAND2	PRJNA716130	feces metagenome	43299	fecal microbiome	fecal	fecal	Germany: Kronberg	Ailurus fulgens	50.18 N 8.49 E	Canoidea	Carnivore	11.9055	4.89335	70	49.3491
BER0805MAEH2	PRJNA716130	feces metagenome	43228	fecal microbiome	fecal	fecal	Germany: Berlin	Chrysocyon brachyurus	52.50 N 13.53 E	Canoidea	Carnivore	7.98692	4.51426	63	66.4491
BER0805MEAH1	PRJNA716130	feces metagenome	43228	fecal microbiome	fecal	fecal	Germany: Berlin	Chrysocyon brachyurus	52.50 N 13.53 E	Canoidea	Carnivore	6.76566	4.08829	69	70.3585
DOR0606MAEH1	PRJNA716130	feces metagenome	43257	fecal microbiome	fecal	fecal	Germany: Dortmund	Chrysocyon brachyurus	51.47 N 7.47 E	Canoidea	Carnivore	4.82084	4.07902	47	73.791
DOR0606MAEH2	PRJNA716130	feces metagenome	43257	fecal microbiome	fecal	fecal	Germany: Dortmund	Chrysocyon brachyurus	51.47 N 7.47 E	Canoidea	Carnivore	6.9297	4.97834	100	68.5696
DOR1306MAEH3	PRJNA716130	feces metagenome	43264	fecal microbiome	fecal	fecal	Germany: Dortmund	Chrysocyon brachyurus	51.47 N 7.47 E	Canoidea	Carnivore	6.37847	4.46332	41	34.9346
DOR1306MAEH4	PRJNA716130	feces metagenome	43264	fecal microbiome	fecal	fecal	Germany: Dortmund	Chrysocyon brachyurus	51.47 N 7.47 E	Canoidea	Carnivore	12.2516	5.0775	114	56.8152
MUE0208MAEH1	PRJNA716130	feces metagenome	43314	fecal microbiome	fecal	fecal	Germany: Munich	Chrysocyon brachyurus	48.10 N 11.55 E	Canoidea	Carnivore	4.10089	3.72543	39	48.5128
MUE0208MAEH2	PRJNA716130	feces metagenome	43314	fecal microbiome	fecal	fecal	Germany: Munich	Chrysocyon brachyurus	48.10 N 11.55 E	Canoidea	Carnivore	4.2286	2.76786	27	42.5597
MUE0908MAEH3	PRJNA716130	feces metagenome	43321	fecal microbiome	fecal	fecal	Germany: Munich	Chrysocyon brachyurus	48.10 N 11.55 E	Canoidea	Carnivore	5.18706	4.41609	52	77.2195
MUE0908MAEH4	PRJNA716130	feces metagenome	43321	fecal microbiome	fecal	fecal	Germany: Munich	Chrysocyon brachyurus	48.10 N 11.55 E	Canoidea	Carnivore	5.82682	4.4278	53	129.846
NEU0405MAEH4	PRJNA716130	feces metagenome	43224	fecal microbiome	fecal	fecal	Germany: Neuwied	Chrysocyon brachyurus	50.45 N 7.57 E	Canoidea	Carnivore	5.39461	3.63577	50	24.3421
NEU0405MAEH5	PRJNA716130	feces metagenome	43224	fecal microbiome	fecal	fecal	Germany: Neuwied	Chrysocyon brachyurus	50.45 N 7.57 E	Canoidea	Carnivore	5.15868	3.83198	38	57.4762
NEU2704MAEH1	PRJNA716130	feces metagenome	43217	fecal microbiome	fecal	fecal	Germany: Neuwied	Chrysocyon brachyurus	50.45 N 7.57 E	Canoidea	Carnivore	4.08173	4.27877	44	34.7916
NEU2704MAEH2	PRJNA716130	feces metagenome	43217	fecal microbiome	fecal	fecal	Germany: Neuwied	Chrysocyon brachyurus	50.45 N 7.57 E	Canoidea	Carnivore	3.61885	3.51653	28	31.6315
NEU2704MAEH3	PRJNA716130	feces metagenome	43217	fecal microbiome	fecal	fecal	Germany: Neuwied	Chrysocyon brachyurus	50.45 N 7.57 E	Canoidea	Carnivore	3.06801	2.637	14	48.3268
BEZ0603WILD1	PRJNA716130	feces metagenome	43896	fecal microbiome	fecal	fecal	Germany: Berlin	Lycaon pictus	52.51 N 13.34 E	Canoidea	Carnivore	32.5696	5.54147	249	76.2355
BEZ0603WILD2	PRJNA716130	feces metagenome	43896	fecal microbiome	fecal	fecal	Germany: Berlin	Lycaon pictus	52.51 N 13.34 E	Canoidea	Carnivore	35.8356	7.19546	234	71.289
BEZ2505WILD1	PRJNA716130	feces metagenome	43976	fecal microbiome	fecal	fecal	Germany: Berlin	Lycaon pictus	52.51 N 13.34 E	Canoidea	Carnivore	34.7061	7.17707	251	47.9771
BEZ2505WILD2	PRJNA716130	feces metagenome	43976	fecal microbiome	fecal	fecal	Germany: Berlin	Lycaon pictus	52.51 N 13.34 E	Canoidea	Carnivore	39.3831	7.79364	402	37.6057
BEZ2605WILD1	PRJNA716130	feces metagenome	43977	fecal microbiome	fecal	fecal	Germany: Berlin	Lycaon pictus	52.51 N 13.34 E	Canoidea	Carnivore	10.5664	4.19567	55	51.3511
BEZ2605WILD2	PRJNA716130	feces metagenome	43977	fecal microbiome	fecal	fecal	Germany: Berlin	Lycaon pictus	52.51 N 13.34 E	Canoidea	Carnivore	10.0533	4.17191	46	96.8614
DUI0406WILD1	PRJNA716130	feces metagenome	43255	fecal microbiome	fecal	fecal	Germany: Duisburg	Lycaon pictus	51.44 N 6.80 E	Canoidea	Carnivore	9.06099	3.67358	60	153.386
DUI1106WILD2	PRJNA716130	feces metagenome	43384	fecal microbiome	fecal	fecal	Germany: Duisburg	Lycaon pictus	51.44 N 6.80 E	Canoidea	Carnivore	9.99603	5.08017	77	145.065
DUI1106WILD3	PRJNA716130	feces metagenome	43384	fecal microbiome	fecal	fecal	Germany: Duisburg	Lycaon pictus	51.44 N 6.80 E	Canoidea	Carnivore	12.5573	4.75584	62	72.8167
FRA0207WILD4	PRJNA716130	feces metagenome	43283	fecal microbiome	fecal	fecal	Germany: Frankfurt	Lycaon pictus	50.11 N 8.70 E	Canoidea	Carnivore	11.6692	4.95908	63	130.945
FRA0207WILD5	PRJNA716130	feces metagenome	43283	fecal microbiome	fecal	fecal	Germany: Frankfurt	Lycaon pictus	50.11 N 8.70 E	Canoidea	Carnivore	11.6354	5.32139	70	218.799
FRA0207WILD6	PRJNA716130	feces metagenome	43283	fecal microbiome	fecal	fecal	Germany: Frankfurt	Lycaon pictus	50.11 N 8.70 E	Canoidea	Carnivore	8.72112	4.29363	43	162.531
FRA1411WILD10	PRJNA716130	feces metagenome	43418	fecal microbiome	fecal	fecal	Germany: Frankfurt	Lycaon pictus	50.11 N 8.70 E	Canoidea	Carnivore	9.61045	4.15017	45	186.421
FRA1411WILD11	PRJNA716130	feces metagenome	43418	fecal microbiome	fecal	fecal	Germany: Frankfurt	Lycaon pictus	50.11 N 8.70 E	Canoidea	Carnivore	10.3834	4.22903	50	313.912
FRA1411WILD7	PRJNA716130	feces metagenome	43418	fecal microbiome	fecal	fecal	Germany: Frankfurt	Lycaon pictus	50.11 N 8.70 E	Canoidea	Carnivore	5.74214	3.67585	28	149.832
FRA1411WILD8	PRJNA716130	feces metagenome	43418	fecal microbiome	fecal	fecal	Germany: Frankfurt	Lycaon pictus	50.11 N 8.70 E	Canoidea	Carnivore	7.33935	4.40996	40	180.997
FRA1411WILD9	PRJNA716130	feces metagenome	43418	fecal microbiome	fecal	fecal	Germany: Frankfurt	Lycaon pictus	50.11 N 8.70 E	Canoidea	Carnivore	7.10049	4.70058	50	344.048
FRA2506WILD1	PRJNA716130	feces metagenome	43276	fecal microbiome	fecal	fecal	Germany: Frankfurt	Lycaon pictus	50.11 N 8.70 E	Canoidea	Carnivore	9.98763	4.88566	64	192.85
FRA2506WILD2	PRJNA716130	feces metagenome	43276	fecal microbiome	fecal	fecal	Germany: Frankfurt	Lycaon pictus	50.11 N 8.70 E	Canoidea	Carnivore	8.55354	4.59115	58	127.993
FRA2506WILD3	PRJNA716130	feces metagenome	43276	fecal microbiome	fecal	fecal	Germany: Frankfurt	Lycaon pictus	50.11 N 8.70 E	Canoidea	Carnivore	12.8791	4.897	65	185.237
BER0805LOEF1	PRJNA716130	feces metagenome	43228	fecal microbiome	fecal	fecal	Germany: Berlin	Otocyon megalotis	52.50 N 13.53 E	Canoidea	Carnivore	8.45608	4.44519	49	265.339
BER0805LOEF2	PRJNA716130	feces metagenome	43228	fecal microbiome	fecal	fecal	Germany: Berlin	Otocyon megalotis	52.50 N 13.53 E	Canoidea	Carnivore	8.88951	3.61309	46	228.861
BER1505LOEF3	PRJNA716130	feces metagenome	43235	fecal microbiome	fecal	fecal	Germany: Berlin	Otocyon megalotis	52.50 N 13.53 E	Canoidea	Carnivore	7.55204	4.35734	46	77.4342
DOR0606LOEF1	PRJNA716130	feces metagenome	43257	fecal microbiome	fecal	fecal	Germany: Dortmund	Otocyon megalotis	51.47 N 7.47 E	Canoidea	Carnivore	9.27993	4.68143	52	164.18
DOR0606LOEF2	PRJNA716130	feces metagenome	43257	fecal microbiome	fecal	fecal	Germany: Dortmund	Otocyon megalotis	51.47 N 7.47 E	Canoidea	Carnivore	13.1295	5.10621	77	168.649
DOR1306LOEF3	PRJNA716130	feces metagenome	43264	fecal microbiome	fecal	fecal	Germany: Dortmund	Otocyon megalotis	51.47 N 7.47 E	Canoidea	Carnivore	7.44885	4.20791	44	266.389
DOR1306LOEF4	PRJNA716130	feces metagenome	43264	fecal microbiome	fecal	fecal	Germany: Dortmund	Otocyon megalotis	51.47 N 7.47 E	Canoidea	Carnivore	6.21163	4.28202	40	91.0303
DOR1306LOEF5	PRJNA716130	feces metagenome	43264	fecal microbiome	fecal	fecal	Germany: Dortmund	Otocyon megalotis	51.47 N 7.47 E	Canoidea	Carnivore	38.4033	7.14103	276	158.85
KRE0706LOEF1	PRJNA716130	feces metagenome	43258	fecal microbiome	fecal	fecal	Germany: Krefeld	Otocyon megalotis	51.36 N 6.63 E	Canoidea	Carnivore	38.8776	6.69388	257	212.813
KRE0706LOEF2	PRJNA716130	feces metagenome	43258	fecal microbiome	fecal	fecal	Germany: Krefeld	Otocyon megalotis	51.36 N 6.63 E	Canoidea	Carnivore	35.1229	6.68437	216	237.237
KRE0706LOEF3	PRJNA716130	feces metagenome	43258	fecal microbiome	fecal	fecal	Germany: Krefeld	Otocyon megalotis	51.36 N 6.63 E	Canoidea	Carnivore	31.4737	6.34214	189	222.088
KRE1406LOEF4	PRJNA716130	feces metagenome	43265	fecal microbiome	fecal	fecal	Germany: Krefeld	Otocyon megalotis	51.36 N 6.63 E	Canoidea	Carnivore	35.4166	6.43575	206	333.599
OPE1807LOEF1	PRJNA716130	feces metagenome	43299	fecal microbiome	fecal	fecal	Germany: Kronberg	Otocyon megalotis	50.18 N 8.49 E	Canoidea	Carnivore	9.98935	4.19644	55	39.6979
OPE1807LOEF2	PRJNA716130	feces metagenome	43299	fecal microbiome	fecal	fecal	Germany: Kronberg	Otocyon megalotis	50.18 N 8.49 E	Canoidea	Carnivore	8.33278	4.2536	46	119.032
OPE1807LOEF3	PRJNA716130	feces metagenome	43299	fecal microbiome	fecal	fecal	Germany: Kronberg	Otocyon megalotis	50.18 N 8.49 E	Canoidea	Carnivore	7.47048	4.30124	46	237.807
OPE2507LOEF4	PRJNA716130	feces metagenome	43306	fecal microbiome	fecal	fecal	Germany: Kronberg	Otocyon megalotis	50.18 N 8.49 E	Canoidea	Carnivore	9.50061	4.22785	61	59.3512
OPE2507LOEF5	PRJNA716130	feces metagenome	43306	fecal microbiome	fecal	fecal	Germany: Kronberg	Otocyon megalotis	50.18 N 8.49 E	Canoidea	Carnivore	7.92853	3.55348	39	221.455
OPE2507LOEF6	PRJNA716130	feces metagenome	43306	fecal microbiome	fecal	fecal	Germany: Kronberg	Otocyon megalotis	50.18 N 8.49 E	Canoidea	Carnivore	11.5227	4.0398	59	133.399
BER0403WALD	PRJNA716130	feces metagenome	43894	fecal microbiome	fecal	fecal	Germany: Berlin	Speothos venaticus	52.50 N 13.53 E	Canoidea	Carnivore	9.70074	5.16359	62	212.097
BER0503WALD	PRJNA716130	feces metagenome	43895	fecal microbiome	fecal	fecal	Germany: Berlin	Speothos venaticus	52.50 N 13.53 E	Canoidea	Carnivore	10.4433	5.0384	62	157.273
BER0805WALD1	PRJNA716130	feces metagenome	43228	fecal microbiome	fecal	fecal	Germany: Berlin	Speothos venaticus	52.50 N 13.53 E	Canoidea	Carnivore	17.5457	6.25717	143	101.745
BER0805WALD2	PRJNA716130	feces metagenome	43228	fecal microbiome	fecal	fecal	Germany: Berlin	Speothos venaticus	52.50 N 13.53 E	Canoidea	Carnivore	9.25438	4.36494	52	103.207
BER0805WALD3	PRJNA716130	feces metagenome	43228	fecal microbiome	fecal	fecal	Germany: Berlin	Speothos venaticus	52.50 N 13.53 E	Canoidea	Carnivore	9.78283	4.61573	50	89.3871
BER0905WALD10	PRJNA716130	feces metagenome	43229	fecal microbiome	fecal	fecal	Germany: Berlin	Speothos venaticus	52.50 N 13.53 E	Canoidea	Carnivore	10.559	5.15344	70	221.242
BER0905WALD4	PRJNA716130	feces metagenome	43229	fecal microbiome	fecal	fecal	Germany: Berlin	Speothos venaticus	52.50 N 13.53 E	Canoidea	Carnivore	9.9522	4.85824	63	187.204
BER0905WALD5	PRJNA716130	feces metagenome	43229	fecal microbiome	fecal	fecal	Germany: Berlin	Speothos venaticus	52.50 N 13.53 E	Canoidea	Carnivore	5.59111	3.11586	25	82.0169
BER0905WALD6	PRJNA716130	feces metagenome	43229	fecal microbiome	fecal	fecal	Germany: Berlin	Speothos venaticus	52.50 N 13.53 E	Canoidea	Carnivore	9.37847	4.83705	58	41.5569
BER0905WALD7	PRJNA716130	feces metagenome	43229	fecal microbiome	fecal	fecal	Germany: Berlin	Speothos venaticus	52.50 N 13.53 E	Canoidea	Carnivore	5.38203	3.80933	36	99.9287
BER0905WALD8	PRJNA716130	feces metagenome	43229	fecal microbiome	fecal	fecal	Germany: Berlin	Speothos venaticus	52.50 N 13.53 E	Canoidea	Carnivore	8.26539	3.6883	36	47.8054
BER0905WALD9	PRJNA716130	feces metagenome	43229	fecal microbiome	fecal	fecal	Germany: Berlin	Speothos venaticus	52.50 N 13.53 E	Canoidea	Carnivore	7.58401	3.84457	38	90.038
FRA0207WALD10	PRJNA716130	feces metagenome	43283	fecal microbiome	fecal	fecal	Germany: Frankfurt	Speothos venaticus	50.11 N 8.70 E	Canoidea	Carnivore	6.74385	4.2054	40	122.348
FRA0207WALD9	PRJNA716130	feces metagenome	43283	fecal microbiome	fecal	fecal	Germany: Frankfurt	Speothos venaticus	50.11 N 8.70 E	Canoidea	Carnivore	9.87819	4.58166	55	114.608
FRA1411WALD11	PRJNA716130	feces metagenome	43418	fecal microbiome	fecal	fecal	Germany: Frankfurt	Speothos venaticus	50.11 N 8.70 E	Canoidea	Carnivore	10.7798	3.82667	53	133.847
FRA2506WALD1	PRJNA716130	feces metagenome	43276	fecal microbiome	fecal	fecal	Germany: Frankfurt	Speothos venaticus	50.11 N 8.70 E	Canoidea	Carnivore	11.9163	4.84985	66	40.7291
FRA2506WALD2	PRJNA716130	feces metagenome	43276	fecal microbiome	fecal	fecal	Germany: Frankfurt	Speothos venaticus	50.11 N 8.70 E	Canoidea	Carnivore	8.78129	3.67947	43	127.284
FRA2606WALD3	PRJNA716130	feces metagenome	43277	fecal microbiome	fecal	fecal	Germany: Frankfurt	Speothos venaticus	50.11 N 8.70 E	Canoidea	Carnivore	8.89725	2.39103	46	26.6959
FRA2606WALD4	PRJNA716130	feces metagenome	43277	fecal microbiome	fecal	fecal	Germany: Frankfurt	Speothos venaticus	50.11 N 8.70 E	Canoidea	Carnivore	19.0782	6.4621	233	58.5383
FRA2806WALD5	PRJNA716130	feces metagenome	43279	fecal microbiome	fecal	fecal	Germany: Frankfurt	Speothos venaticus	50.11 N 8.70 E	Canoidea	Carnivore	16.0718	5.74535	108	134.771
FRA2806WALD6	PRJNA716130	feces metagenome	43279	fecal microbiome	fecal	fecal	Germany: Frankfurt	Speothos venaticus	50.11 N 8.70 E	Canoidea	Carnivore	5.44125	3.11121	31	104.141
FRA2906WALD7	PRJNA716130	feces metagenome	43280	fecal microbiome	fecal	fecal	Germany: Frankfurt	Speothos venaticus	50.11 N 8.70 E	Canoidea	Carnivore	9.58149	3.42799	62	53.174
FRA2906WALD8	PRJNA716130	feces metagenome	43280	fecal microbiome	fecal	fecal	Germany: Frankfurt	Speothos venaticus	50.11 N 8.70 E	Canoidea	Carnivore	9.88299	3.73619	64	82.8458
LAN0305WALD1	PRJNA716130	feces metagenome	43223	fecal microbiome	fecal	fecal	Germany: Landau	Speothos venaticus	49.20 N 8.11 E	Canoidea	Carnivore	6.66421	3.43706	48	23.6601
LAN2604WALD2	PRJNA716130	feces metagenome	43216	fecal microbiome	fecal	fecal	Germany: Landau	Speothos venaticus	49.20 N 8.11 E	Canoidea	Carnivore	11.0694	5.1091	94	39.6554
STU2006WALD1	PRJNA716130	feces metagenome	43271	fecal microbiome	fecal	fecal	Germany: Stuttgart	Speothos venaticus	48.81 N 9.20 E	Canoidea	Carnivore	14.9633	5.59266	119	45.7952
STU2006WALD2	PRJNA716130	feces metagenome	43271	fecal microbiome	fecal	fecal	Germany: Stuttgart	Speothos venaticus	48.81 N 9.20 E	Canoidea	Carnivore	13.9818	5.44621	94	78.9078
STU2706WALD3	PRJNA716130	feces metagenome	43278	fecal microbiome	fecal	fecal	Germany: Stuttgart	Speothos venaticus	48.81 N 9.20 E	Canoidea	Carnivore	13.7442	6.05569	130	37.9233
STU2706WALD4	PRJNA716130	feces metagenome	43278	fecal microbiome	fecal	fecal	Germany: Stuttgart	Speothos venaticus	48.81 N 9.20 E	Canoidea	Carnivore	11.8979	4.9959	93	31.361
GEL0910BRAU1	PRJNA716130	feces metagenome	43747	fecal microbiome	fecal	fecal	Germany: Gelsenkirchen	Ursus arctos	51.54 N 7.11 E	Canoidea	Carnivore	11.8879	5.13144	94	18.1892
GEL0910BRAU2	PRJNA716130	feces metagenome	43747	fecal microbiome	fecal	fecal	Germany: Gelsenkirchen	Ursus arctos	51.54 N 7.11 E	Canoidea	Carnivore	6.27175	4.31515	40	67.1226
GEL0910BRAU3	PRJNA716130	feces metagenome	43747	fecal microbiome	fecal	fecal	Germany: Gelsenkirchen	Ursus arctos	51.54 N 7.11 E	Canoidea	Carnivore	9.24259	4.08252	43	22.523
GEL0910BRAU4	PRJNA716130	feces metagenome	43747	fecal microbiome	fecal	fecal	Germany: Gelsenkirchen	Ursus arctos	51.54 N 7.11 E	Canoidea	Carnivore	27.3466	5.80704	188	26.7377
GEL0910KAMT1	PRJNA716130	feces metagenome	43747	fecal microbiome	fecal	fecal	Germany: Gelsenkirchen	Ursus arctos	51.54 N 7.11 E	Canoidea	Carnivore	40.8227	7.58978	428	58.9026
GEL0910KAMT2	PRJNA716130	feces metagenome	43747	fecal microbiome	fecal	fecal	Germany: Gelsenkirchen	Ursus arctos	51.54 N 7.11 E	Canoidea	Carnivore	33.5526	6.85576	281	48.9407
GEL0910KAMT3	PRJNA716130	feces metagenome	43747	fecal microbiome	fecal	fecal	Germany: Gelsenkirchen	Ursus arctos	51.54 N 7.11 E	Canoidea	Carnivore	42.5016	7.52715	498	70.7816
HEI0107BAER	PRJNA716130	feces metagenome	43647	fecal microbiome	fecal	fecal	Germany: Heidelberg	Ursus arctos	49.41 N 8.67 E	Canoidea	Carnivore	23.5721	6.25507	194	160.092
HEI1206BAER	PRJNA716130	feces metagenome	43628	fecal microbiome	fecal	fecal	Germany: Heidelberg	Ursus arctos	49.41 N 8.67 E	Canoidea	Carnivore	33.6045	7.4992	280	91.3103
HEI1710BAERW	PRJNA716130	feces metagenome	43755	fecal microbiome	fecal	fecal	Germany: Heidelberg	Ursus arctos	49.41 N 8.67 E	Canoidea	Carnivore	26.7798	7.06702	203	86.7748
HEI1908BAER	PRJNA716130	feces metagenome	43696	fecal microbiome	fecal	fecal	Germany: Heidelberg	Ursus arctos	49.41 N 8.67 E	Canoidea	Carnivore	25.354	6.4837	127	59.6376
HEI1908BAERK	PRJNA716130	feces metagenome	43696	fecal microbiome	fecal	fecal	Germany: Heidelberg	Ursus arctos	49.41 N 8.67 E	Canoidea	Carnivore	34.3594	7.32767	269	59.0875
HEI1909BAER	PRJNA716130	feces metagenome	43727	fecal microbiome	fecal	fecal	Germany: Heidelberg	Ursus arctos	49.41 N 8.67 E	Canoidea	Carnivore	37.7453	7.79497	343	145.233
KLN1605BAER	PRJNA716130	feces metagenome	43967	fecal microbiome	fecal	fecal	Germany: Cologne	Ursus arctos	50.95 N 6.91 E	Canoidea	Carnivore	29.4771	6.42941	193	22.7116
KLN1705BAER	PRJNA716130	feces metagenome	43968	fecal microbiome	fecal	fecal	Germany: Cologne	Ursus arctos	50.95 N 6.91 E	Canoidea	Carnivore	37.7813	7.7038	366	27.6264
KLN1805BAER	PRJNA716130	feces metagenome	43969	fecal microbiome	fecal	fecal	Germany: Cologne	Ursus arctos	50.95 N 6.91 E	Canoidea	Carnivore	35.0461	7.38434	288	30.8779
KLN1905BAER	PRJNA716130	feces metagenome	43970	fecal microbiome	fecal	fecal	Germany: Cologne	Ursus arctos	50.95 N 6.91 E	Canoidea	Carnivore	31.7883	7.32941	266	55.4181
KLN2005BAER	PRJNA716130	feces metagenome	43971	fecal microbiome	fecal	fecal	Germany: Cologne	Ursus arctos	50.95 N 6.91 E	Canoidea	Carnivore	26.6805	6.49726	167	43.4344
KLN2105BAER	PRJNA716130	feces metagenome	43972	fecal microbiome	fecal	fecal	Germany: Cologne	Ursus arctos	50.95 N 6.91 E	Canoidea	Carnivore	29.1638	6.58953	173	42.6553
KLN2205BAER	PRJNA716130	feces metagenome	43973	fecal microbiome	fecal	fecal	Germany: Cologne	Ursus arctos	50.95 N 6.91 E	Canoidea	Carnivore	31.4878	6.67803	207	90.0534
SCH2505BAER1	PRJNA716130	feces metagenome	43976	fecal microbiome	fecal	fecal	Germany: Schwerin	Ursus arctos	53.61 N 11.43 E	Canoidea	Carnivore	37.3421	7.0354	238	160.372
SCH2505BAER2	PRJNA716130	feces metagenome	43976	fecal microbiome	fecal	fecal	Germany: Schwerin	Ursus arctos	53.61 N 11.43 E	Canoidea	Carnivore	28.5465	6.03148	160	41.4891
SCH2605BAER1	PRJNA716130	feces metagenome	43977	fecal microbiome	fecal	fecal	Germany: Schwerin	Ursus arctos	53.61 N 11.43 E	Canoidea	Carnivore	33.674	7.09882	236	15.9245
SCH2605BAER2	PRJNA716130	feces metagenome	43977	fecal microbiome	fecal	fecal	Germany: Schwerin	Ursus arctos	53.61 N 11.43 E	Canoidea	Carnivore	33.0032	6.96242	246	82.772
SCH2705BAER1	PRJNA716130	feces metagenome	43978	fecal microbiome	fecal	fecal	Germany: Schwerin	Ursus arctos	53.61 N 11.43 E	Canoidea	Carnivore	36.7767	6.89805	243	83.7467
SCH2705BAER2	PRJNA716130	feces metagenome	43978	fecal microbiome	fecal	fecal	Germany: Schwerin	Ursus arctos	53.61 N 11.43 E	Canoidea	Carnivore	37.8973	7.19853	297	37.9309
SCH2805BAER1	PRJNA716130	feces metagenome	43979	fecal microbiome	fecal	fecal	Germany: Schwerin	Ursus arctos	53.61 N 11.43 E	Canoidea	Carnivore	40.3275	7.38386	283	46.1538
SCH2805BAER2	PRJNA716130	feces metagenome	43979	fecal microbiome	fecal	fecal	Germany: Schwerin	Ursus arctos	53.61 N 11.43 E	Canoidea	Carnivore	36.7912	7.15141	277	72.1517
SCH2905BAER1	PRJNA716130	feces metagenome	43980	fecal microbiome	fecal	fecal	Germany: Schwerin	Ursus arctos	53.61 N 11.43 E	Canoidea	Carnivore	35.8919	6.94351	213	33.6674
SCH2905BAER2	PRJNA716130	feces metagenome	43980	fecal microbiome	fecal	fecal	Germany: Schwerin	Ursus arctos	53.61 N 11.43 E	Canoidea	Carnivore	39.272	7.53983	307	13.9713
SCH3005BAER	PRJNA716130	feces metagenome	43981	fecal microbiome	fecal	fecal	Germany: Schwerin	Ursus arctos	53.61 N 11.43 E	Canoidea	Carnivore	38.5741	7.37602	293	41.5036
BEZ0603EISB	PRJNA716130	feces metagenome	43896	fecal microbiome	fecal	fecal	Germany: Berlin	Ursus maritimus	52.51 N 13.34 E	Canoidea	Carnivore	34.9006	7.10744	225	10.458
BEZ2505EISB	PRJNA716130	feces metagenome	43976	fecal microbiome	fecal	fecal	Germany: Berlin	Ursus maritimus	52.51 N 13.34 E	Canoidea	Carnivore	20.5184	5.95514	91	52.1958
BEZ2605EISB	PRJNA716130	feces metagenome	43977	fecal microbiome	fecal	fecal	Germany: Berlin	Ursus maritimus	52.51 N 13.34 E	Canoidea	Carnivore	27.7208	6.45822	246	36.6626
GEL0910EISB1	PRJNA716130	feces metagenome	43747	fecal microbiome	fecal	fecal	Germany: Gelsenkirchen	Ursus maritimus	51.54 N 7.11 E	Canoidea	Carnivore	29.0841	5.89685	234	41.5558
GEL0910EISB2	PRJNA716130	feces metagenome	43747	fecal microbiome	fecal	fecal	Germany: Gelsenkirchen	Ursus maritimus	51.54 N 7.11 E	Canoidea	Carnivore	29.9246	6.79008	284	57.7597
GEL0910EISB3	PRJNA716130	feces metagenome	43747	fecal microbiome	fecal	fecal	Germany: Gelsenkirchen	Ursus maritimus	51.54 N 7.11 E	Canoidea	Carnivore	23.115	6.06995	187	95.1938
NUR0503EISB	PRJNA716130	feces metagenome	43895	fecal microbiome	fecal	fecal	Germany: Nurenberg	Ursus maritimus	49.45 N 11.14 E	Canoidea	Carnivore	26.8014	6.37217	239	63.0558
SCH2905NASH2	PRJNA716130	feces metagenome	43980	fecal microbiome	fecal	fecal	Germany: Schwerin	Ursus maritimus	53.61 N 11.43 E	Canoidea	Carnivore	27.8656	6.62005	223	1221.01
DUI0406EISF1	PRJNA716130	feces metagenome	43255	fecal microbiome	fecal	fecal	Germany: Duisburg	Vulpes lagopus	51.44 N 6.80 E	Canoidea	Carnivore	31.1619	7.16333	230	196.902
DUI0406EISF2	PRJNA716130	feces metagenome	43255	fecal microbiome	fecal	fecal	Germany: Duisburg	Vulpes lagopus	51.44 N 6.80 E	Canoidea	Carnivore	39.3454	6.93361	408	313.004
DUI1106EISF3	PRJNA716130	feces metagenome	43384	fecal microbiome	fecal	fecal	Germany: Duisburg	Vulpes lagopus	51.44 N 6.80 E	Canoidea	Carnivore	34.4968	6.36117	293	423.958
DUI1106EISF4	PRJNA716130	feces metagenome	43384	fecal microbiome	fecal	fecal	Germany: Duisburg	Vulpes lagopus	51.44 N 6.80 E	Canoidea	Carnivore	27.7708	6.08977	208	254.973
OPE1807EISF1	PRJNA716130	feces metagenome	43299	fecal microbiome	fecal	fecal	Germany: Kronberg	Vulpes lagopus	50.18 N 8.49 E	Canoidea	Carnivore	33.3976	6.95426	300	239.29
OPE1807EISF2	PRJNA716130	feces metagenome	43299	fecal microbiome	fecal	fecal	Germany: Kronberg	Vulpes lagopus	50.18 N 8.49 E	Canoidea	Carnivore	26.6455	6.17984	186	246.882
OPE1807EISF3	PRJNA716130	feces metagenome	43299	fecal microbiome	fecal	fecal	Germany: Kronberg	Vulpes lagopus	50.18 N 8.49 E	Canoidea	Carnivore	26.0667	6.22645	187	147.667
OPE1807EISF4	PRJNA716130	feces metagenome	43299	fecal microbiome	fecal	fecal	Germany: Kronberg	Vulpes lagopus	50.18 N 8.49 E	Canoidea	Carnivore	39.5993	7.90316	486	194.011
OPE1807EISF5	PRJNA716130	feces metagenome	43299	fecal microbiome	fecal	fecal	Germany: Kronberg	Vulpes lagopus	50.18 N 8.49 E	Canoidea	Carnivore	37.2399	7.70991	422	229.912
OPE1807EISF6	PRJNA716130	feces metagenome	43299	fecal microbiome	fecal	fecal	Germany: Kronberg	Vulpes lagopus	50.18 N 8.49 E	Canoidea	Carnivore	32.5534	7.37465	290	189.653
OPE2507EISF10	PRJNA716130	feces metagenome	43306	fecal microbiome	fecal	fecal	Germany: Kronberg	Vulpes lagopus	50.18 N 8.49 E	Canoidea	Carnivore	29.087	7.04787	248	227.966
OPE2507EISF11	PRJNA716130	feces metagenome	43306	fecal microbiome	fecal	fecal	Germany: Kronberg	Vulpes lagopus	50.18 N 8.49 E	Canoidea	Carnivore	27.7345	6.84796	223	204.307
OPE2507EISF12	PRJNA716130	feces metagenome	43306	fecal microbiome	fecal	fecal	Germany: Kronberg	Vulpes lagopus	50.18 N 8.49 E	Canoidea	Carnivore	33.8196	7.29821	320	307.589
OPE2507EISF7	PRJNA716130	feces metagenome	43306	fecal microbiome	fecal	fecal	Germany: Kronberg	Vulpes lagopus	50.18 N 8.49 E	Canoidea	Carnivore	33.3445	7.10379	288	181.592
OPE2507EISF8	PRJNA716130	feces metagenome	43306	fecal microbiome	fecal	fecal	Germany: Kronberg	Vulpes lagopus	50.18 N 8.49 E	Canoidea	Carnivore	32.2614	7.5319	356	174.449
OPE2507EISF9	PRJNA716130	feces metagenome	43306	fecal microbiome	fecal	fecal	Germany: Kronberg	Vulpes lagopus	50.18 N 8.49 E	Canoidea	Carnivore	36.3416	7.61537	375	135.594
DAR0611FENN10	PRJNA716130	feces metagenome	43410	fecal microbiome	fecal	fecal	Germany: Darmstadt	Vulpes zerda	49.87 N 8.68 E	Canoidea	Carnivore	26.9237	6.82206	222	240.043
DAR0611FENN11	PRJNA716130	feces metagenome	43410	fecal microbiome	fecal	fecal	Germany: Darmstadt	Vulpes zerda	49.87 N 8.68 E	Canoidea	Carnivore	28.1085	6.85718	209	135.869
DAR0611FENN12	PRJNA716130	feces metagenome	43410	fecal microbiome	fecal	fecal	Germany: Darmstadt	Vulpes zerda	49.87 N 8.68 E	Canoidea	Carnivore	35.3138	7.40332	333	151.519
DAR0611FENN13	PRJNA716130	feces metagenome	43410	fecal microbiome	fecal	fecal	Germany: Darmstadt	Vulpes zerda	49.87 N 8.68 E	Canoidea	Carnivore	30.3141	6.95746	248	217.77
DAR0611FENN7	PRJNA716130	feces metagenome	43410	fecal microbiome	fecal	fecal	Germany: Darmstadt	Vulpes zerda	49.87 N 8.68 E	Canoidea	Carnivore	33.8233	7.44884	312	125.711
DAR0611FENN8	PRJNA716130	feces metagenome	43410	fecal microbiome	fecal	fecal	Germany: Darmstadt	Vulpes zerda	49.87 N 8.68 E	Canoidea	Carnivore	36.8556	7.58052	360	152.25
DAR0611FENN9	PRJNA716130	feces metagenome	43410	fecal microbiome	fecal	fecal	Germany: Darmstadt	Vulpes zerda	49.87 N 8.68 E	Canoidea	Carnivore	39.6882	7.78426	417	130.955
DAR3010FENN1	PRJNA716130	feces metagenome	43403	fecal microbiome	fecal	fecal	Germany: Darmstadt	Vulpes zerda	49.87 N 8.68 E	Canoidea	Carnivore	36.1206	7.21247	294	241.658
DAR3010FENN2	PRJNA716130	feces metagenome	43403	fecal microbiome	fecal	fecal	Germany: Darmstadt	Vulpes zerda	49.87 N 8.68 E	Canoidea	Carnivore	35.009	7.33354	317	154.691
DAR3010FENN3	PRJNA716130	feces metagenome	43403	fecal microbiome	fecal	fecal	Germany: Darmstadt	Vulpes zerda	49.87 N 8.68 E	Canoidea	Carnivore	40.5936	7.58968	409	193.598
DAR3010FENN4	PRJNA716130	feces metagenome	43403	fecal microbiome	fecal	fecal	Germany: Darmstadt	Vulpes zerda	49.87 N 8.68 E	Canoidea	Carnivore	36.1437	7.23406	303	194.111
DAR3010FENN5	PRJNA716130	feces metagenome	43403	fecal microbiome	fecal	fecal	Germany: Darmstadt	Vulpes zerda	49.87 N 8.68 E	Canoidea	Carnivore	34.4966	7.27794	300	189.456
DAR3010FENN6	PRJNA716130	feces metagenome	43403	fecal microbiome	fecal	fecal	Germany: Darmstadt	Vulpes zerda	49.87 N 8.68 E	Canoidea	Carnivore	36.4845	7.00311	278	221.701
FRA0207FENN3	PRJNA716130	feces metagenome	43283	fecal microbiome	fecal	fecal	Germany: Frankfurt	Vulpes zerda	50.11 N 8.70 E	Canoidea	Carnivore	37.2434	7.14325	303	243.605
FRA0207FENN4	PRJNA716130	feces metagenome	43283	fecal microbiome	fecal	fecal	Germany: Frankfurt	Vulpes zerda	50.11 N 8.70 E	Canoidea	Carnivore	36.0744	7.25955	320	278.577
FRA1411FENN5	PRJNA716130	feces metagenome	43418	fecal microbiome	fecal	fecal	Germany: Frankfurt	Vulpes zerda	50.11 N 8.70 E	Canoidea	Carnivore	45.2685	8.05517	513	236.458
FRA2506FENN1	PRJNA716130	feces metagenome	43276	fecal microbiome	fecal	fecal	Germany: Frankfurt	Vulpes zerda	50.11 N 8.70 E	Canoidea	Carnivore	39.1753	7.60264	332	218.944
FRA2506FENN2	PRJNA716130	feces metagenome	43276	fecal microbiome	fecal	fecal	Germany: Frankfurt	Vulpes zerda	50.11 N 8.70 E	Canoidea	Carnivore	40.3781	7.57678	366	288.125
LAN2604FENN1	PRJNA716130	feces metagenome	43216	fecal microbiome	fecal	fecal	Germany: Landau	Vulpes zerda	49.20 N 8.11 E	Canoidea	Carnivore	35.6137	7.42066	301	392.211
LAN2604FENN2	PRJNA716130	feces metagenome	43216	fecal microbiome	fecal	fecal	Germany: Landau	Vulpes zerda	49.20 N 8.11 E	Canoidea	Carnivore	27.0637	6.86587	187	346.178
BER0805GEPA1	PRJNA716130	feces metagenome	43228	fecal microbiome	fecal	fecal	Germany: Berlin	Acinonyx jubatus	52.50 N 13.53 E	Feloidea	Carnivore	12.2814	4.33383	72	73.1487
BER0805GEPA2	PRJNA716130	feces metagenome	43228	fecal microbiome	fecal	fecal	Germany: Berlin	Acinonyx jubatus	52.50 N 13.53 E	Feloidea	Carnivore	12.5141	4.26674	59	23.6411
BER1505GEPA2	PRJNA716130	feces metagenome	43235	fecal microbiome	fecal	fecal	Germany: Berlin	Acinonyx jubatus	52.50 N 13.53 E	Feloidea	Carnivore	7.15565	3.87072	41	133.713
KRE0706GEPA1	PRJNA716130	feces metagenome	43258	fecal microbiome	fecal	fecal	Germany: Krefeld	Acinonyx jubatus	51.36 N 6.63 E	Feloidea	Carnivore	6.3649	3.62716	41	130.613
KRE0706GEPA2	PRJNA716130	feces metagenome	43258	fecal microbiome	fecal	fecal	Germany: Krefeld	Acinonyx jubatus	51.36 N 6.63 E	Feloidea	Carnivore	9.21071	3.93869	62	148.035
KRE0706GEPA3	PRJNA716130	feces metagenome	43258	fecal microbiome	fecal	fecal	Germany: Krefeld	Acinonyx jubatus	51.36 N 6.63 E	Feloidea	Carnivore	13.1573	4.57328	89	164.929
KRE0706GEPA4	PRJNA716130	feces metagenome	43258	fecal microbiome	fecal	fecal	Germany: Krefeld	Acinonyx jubatus	51.36 N 6.63 E	Feloidea	Carnivore	14.6569	5.03296	99	80.6559
KRE1306GEPA3	PRJNA716130	feces metagenome	43264	fecal microbiome	fecal	fecal	Germany: Krefeld	Acinonyx jubatus	51.36 N 6.63 E	Feloidea	Carnivore	15.1491	4.97718	123	81.9405
KRE1306GEPA4	PRJNA716130	feces metagenome	43264	fecal microbiome	fecal	fecal	Germany: Krefeld	Acinonyx jubatus	51.36 N 6.63 E	Feloidea	Carnivore	12.6361	4.28794	61	121.852
LAN0305GEPA3	PRJNA716130	feces metagenome	43223	fecal microbiome	fecal	fecal	Germany: Landau	Acinonyx jubatus	49.20 N 8.11 E	Feloidea	Carnivore	11.0227	4.87478	65	142.285
LAN0305GEPA4	PRJNA716130	feces metagenome	43223	fecal microbiome	fecal	fecal	Germany: Landau	Acinonyx jubatus	49.20 N 8.11 E	Feloidea	Carnivore	14.2332	5.38816	102	100.443
LAN2604GEPA1	PRJNA716130	feces metagenome	43216	fecal microbiome	fecal	fecal	Germany: Landau	Acinonyx jubatus	49.20 N 8.11 E	Feloidea	Carnivore	14.4732	5.09087	85	442.381
LAN2604GEPA2	PRJNA716130	feces metagenome	43216	fecal microbiome	fecal	fecal	Germany: Landau	Acinonyx jubatus	49.20 N 8.11 E	Feloidea	Carnivore	13.1183	5.26191	65	606.586
NEU0405GEPA4	PRJNA716130	feces metagenome	43224	fecal microbiome	fecal	fecal	Germany: Neuwied	Acinonyx jubatus	50.45 N 7.57 E	Feloidea	Carnivore	10.5845	4.85198	57	51.6566
NEU0405GEPA5	PRJNA716130	feces metagenome	43224	fecal microbiome	fecal	fecal	Germany: Neuwied	Acinonyx jubatus	50.45 N 7.57 E	Feloidea	Carnivore	12.9947	5.22164	69	100.797
NEU2704GEPA1	PRJNA716130	feces metagenome	43217	fecal microbiome	fecal	fecal	Germany: Neuwied	Acinonyx jubatus	50.45 N 7.57 E	Feloidea	Carnivore	17.2915	5.22801	101	9.43575
NEU2704GEPA2	PRJNA716130	feces metagenome	43217	fecal microbiome	fecal	fecal	Germany: Neuwied	Acinonyx jubatus	50.45 N 7.57 E	Feloidea	Carnivore	16.0435	5.74911	103	60.1503
NEU2704GEPA3	PRJNA716130	feces metagenome	43217	fecal microbiome	fecal	fecal	Germany: Neuwied	Acinonyx jubatus	50.45 N 7.57 E	Feloidea	Carnivore	15.4309	5.00951	99	78.0417
OPE1807GEPA1	PRJNA716130	feces metagenome	43299	fecal microbiome	fecal	fecal	Germany: Kronberg	Acinonyx jubatus	50.18 N 8.49 E	Feloidea	Carnivore	14.2185	5.19848	93	197.093
OPE1807GEPA2	PRJNA716130	feces metagenome	43299	fecal microbiome	fecal	fecal	Germany: Kronberg	Acinonyx jubatus	50.18 N 8.49 E	Feloidea	Carnivore	17.6394	5.84078	129	135.661
OPE2507GEPA3	PRJNA716130	feces metagenome	43306	fecal microbiome	fecal	fecal	Germany: Kronberg	Acinonyx jubatus	50.18 N 8.49 E	Feloidea	Carnivore	11.7853	5.2827	63	125.532
OPE2507GEPA4	PRJNA716130	feces metagenome	43306	fecal microbiome	fecal	fecal	Germany: Kronberg	Acinonyx jubatus	50.18 N 8.49 E	Feloidea	Carnivore	18.0698	5.74621	122	213.553
OPE2507GEPA5	PRJNA716130	feces metagenome	43306	fecal microbiome	fecal	fecal	Germany: Kronberg	Acinonyx jubatus	50.18 N 8.49 E	Feloidea	Carnivore	18.7396	6.04963	132	67.6261
STU2006GEPA1	PRJNA716130	feces metagenome	43271	fecal microbiome	fecal	fecal	Germany: Stuttgart	Acinonyx jubatus	48.81 N 9.20 E	Feloidea	Carnivore	15.4547	5.54116	96	110.078
STU2706GEPA2	PRJNA716130	feces metagenome	43278	fecal microbiome	fecal	fecal	Germany: Stuttgart	Acinonyx jubatus	48.81 N 9.20 E	Feloidea	Carnivore	13.6157	5.47768	103	108.603
STU2706GEPA3	PRJNA716130	feces metagenome	43278	fecal microbiome	fecal	fecal	Germany: Stuttgart	Acinonyx jubatus	48.81 N 9.20 E	Feloidea	Carnivore	15.9093	5.50891	101	119.217
WUP0506GEPA1	PRJNA716130	feces metagenome	43256	fecal microbiome	fecal	fecal	Germany: Wuppertal	Acinonyx jubatus	51.24 N 7.11 E	Feloidea	Carnivore	12.3724	4.99496	80	34.1857
WUP1206GEPA2	PRJNA716130	feces metagenome	43263	fecal microbiome	fecal	fecal	Germany: Wuppertal	Acinonyx jubatus	51.24 N 7.11 E	Feloidea	Carnivore	13.4708	5.26792	83	67.5049
DUI1607FOSA1	PRJNA716130	feces metagenome	43662	fecal microbiome	fecal	fecal	Germany: Duisburg	Cryptoprocta ferox	51.44 N 6.80 E	Feloidea	Carnivore	7.81136	4.60959	46	44.9287
DUI1607FOSA2	PRJNA716130	feces metagenome	43662	fecal microbiome	fecal	fecal	Germany: Duisburg	Cryptoprocta ferox	51.44 N 6.80 E	Feloidea	Carnivore	20.5278	6.40785	134	67.7042
DUI1607FOSA3	PRJNA716130	feces metagenome	43662	fecal microbiome	fecal	fecal	Germany: Duisburg	Cryptoprocta ferox	51.44 N 6.80 E	Feloidea	Carnivore	10.714	4.95783	53	108.943
HEI1103FOSA	PRJNA716130	feces metagenome	43901	fecal microbiome	fecal	fecal	Germany: Heidelberg	Cryptoprocta ferox	49.41 N 8.67 E	Feloidea	Carnivore	17.7768	6.09217	94	47.0612
HEI1203FOSA	PRJNA716130	feces metagenome	43902	fecal microbiome	fecal	fecal	Germany: Heidelberg	Cryptoprocta ferox	49.41 N 8.67 E	Feloidea	Carnivore	8.1476	2.24451	28	163.135
NKN1008FOSA1	PRJNA716130	feces metagenome	44053	fecal microbiome	fecal	fecal	Germany: Neunkirchen	Cryptoprocta ferox	49.35 N 7.21 E	Feloidea	Carnivore	7.17149	4.09685	52	87.673
NKN1008FOSA2	PRJNA716130	feces metagenome	44053	fecal microbiome	fecal	fecal	Germany: Neunkirchen	Cryptoprocta ferox	49.35 N 7.21 E	Feloidea	Carnivore	7.13096	4.35724	40	187.027
NKN3007FOSA1	PRJNA716130	feces metagenome	44042	fecal microbiome	fecal	fecal	Germany: Neunkirchen	Cryptoprocta ferox	49.35 N 7.21 E	Feloidea	Carnivore	6.52091	3.94462	37	129.743
NKN3007FOSA2	PRJNA716130	feces metagenome	44042	fecal microbiome	fecal	fecal	Germany: Neunkirchen	Cryptoprocta ferox	49.35 N 7.21 E	Feloidea	Carnivore	10.7535	4.61311	52	89.0375
BER0805NEBE1	PRJNA716130	feces metagenome	43228	fecal microbiome	fecal	fecal	Germany: Berlin	Neofelis nebulosa	52.50 N 13.53 E	Feloidea	Carnivore	14.408	4.8504	74	159.86
DOR0606NEBE1	PRJNA716130	feces metagenome	43257	fecal microbiome	fecal	fecal	Germany: Dortmund	Neofelis nebulosa	51.47 N 7.47 E	Feloidea	Carnivore	5.2898	2.61021	26	93.085
DOR0606NEBE2	PRJNA716130	feces metagenome	43257	fecal microbiome	fecal	fecal	Germany: Dortmund	Neofelis nebulosa	51.47 N 7.47 E	Feloidea	Carnivore	14.6922	4.60056	75	116.065
DOR1306NEBE3	PRJNA716130	feces metagenome	43264	fecal microbiome	fecal	fecal	Germany: Dortmund	Neofelis nebulosa	51.47 N 7.47 E	Feloidea	Carnivore	10.5912	4.97844	66	57.9792
DOR1306NEBE4	PRJNA716130	feces metagenome	43264	fecal microbiome	fecal	fecal	Germany: Dortmund	Neofelis nebulosa	51.47 N 7.47 E	Feloidea	Carnivore	10.0522	4.88004	53	145.196
DUI0406NEBE1	PRJNA716130	feces metagenome	43255	fecal microbiome	fecal	fecal	Germany: Duisburg	Neofelis nebulosa	51.44 N 6.80 E	Feloidea	Carnivore	8.71054	4.34224	62	260.632
DUI0406NEBE2	PRJNA716130	feces metagenome	43255	fecal microbiome	fecal	fecal	Germany: Duisburg	Neofelis nebulosa	51.44 N 6.80 E	Feloidea	Carnivore	10.1829	4.83088	63	103.314
DUI1106NEBE3	PRJNA716130	feces metagenome	43384	fecal microbiome	fecal	fecal	Germany: Duisburg	Neofelis nebulosa	51.44 N 6.80 E	Feloidea	Carnivore	9.3419	4.54194	50	110.95
DUI1106NEBE4	PRJNA716130	feces metagenome	43384	fecal microbiome	fecal	fecal	Germany: Duisburg	Neofelis nebulosa	51.44 N 6.80 E	Feloidea	Carnivore	8.49311	4.00446	47	116.491
WUP0506NEBE1	PRJNA716130	feces metagenome	43256	fecal microbiome	fecal	fecal	Germany: Wuppertal	Neofelis nebulosa	51.24 N 7.11 E	Feloidea	Carnivore	9.89721	5.05268	71	205.2
WUP0506NEBE2	PRJNA716130	feces metagenome	43256	fecal microbiome	fecal	fecal	Germany: Wuppertal	Neofelis nebulosa	51.24 N 7.11 E	Feloidea	Carnivore	10.305	5.37641	69	175.021
WUP0506NEBE3	PRJNA716130	feces metagenome	43256	fecal microbiome	fecal	fecal	Germany: Wuppertal	Neofelis nebulosa	51.24 N 7.11 E	Feloidea	Carnivore	11.062	5.33724	84	96.0492
WUP1206NEBE4	PRJNA716130	feces metagenome	43263	fecal microbiome	fecal	fecal	Germany: Wuppertal	Neofelis nebulosa	51.24 N 7.11 E	Feloidea	Carnivore	8.41408	4.70368	47	116.402
DUI0406LOEW1	PRJNA716130	feces metagenome	43255	fecal microbiome	fecal	fecal	Germany: Duisburg	Panthera leo	51.44 N 6.80 E	Feloidea	Carnivore	8.47164	3.88183	42	76.8798
DUI0406LOEW2	PRJNA716130	feces metagenome	43255	fecal microbiome	fecal	fecal	Germany: Duisburg	Panthera leo	51.44 N 6.80 E	Feloidea	Carnivore	7.85036	3.75091	39	125.322
DUI1106LOEW3	PRJNA716130	feces metagenome	43384	fecal microbiome	fecal	fecal	Germany: Duisburg	Panthera leo	51.44 N 6.80 E	Feloidea	Carnivore	8.13537	4.34665	49	93.873
DUI1106LOEW4	PRJNA716130	feces metagenome	43384	fecal microbiome	fecal	fecal	Germany: Duisburg	Panthera leo	51.44 N 6.80 E	Feloidea	Carnivore	9.22795	4.86635	65	54.8424
FRA0107LOEW3	PRJNA716130	feces metagenome	43282	fecal microbiome	fecal	fecal	Germany: Frankfurt	Panthera leo	50.11 N 8.70 E	Feloidea	Carnivore	6.72425	3.19221	36	156.442
FRA0207LOEW4	PRJNA716130	feces metagenome	43283	fecal microbiome	fecal	fecal	Germany: Frankfurt	Panthera leo	50.11 N 8.70 E	Feloidea	Carnivore	6.98558	4.05137	47	216.243
FRA0207LOEW5	PRJNA716130	feces metagenome	43283	fecal microbiome	fecal	fecal	Germany: Frankfurt	Panthera leo	50.11 N 8.70 E	Feloidea	Carnivore	6.42502	3.54938	37	207.938
FRA0207LOEW6	PRJNA716130	feces metagenome	43283	fecal microbiome	fecal	fecal	Germany: Frankfurt	Panthera leo	50.11 N 8.70 E	Feloidea	Carnivore	10.9417	3.45415	60	104.56
FRA3006LOEW1	PRJNA716130	feces metagenome	43281	fecal microbiome	fecal	fecal	Germany: Frankfurt	Panthera leo	50.11 N 8.70 E	Feloidea	Carnivore	5.52636	3.87799	31	110.352
FRA3006LOEW2	PRJNA716130	feces metagenome	43281	fecal microbiome	fecal	fecal	Germany: Frankfurt	Panthera leo	50.11 N 8.70 E	Feloidea	Carnivore	45.2896	8.20137	442	242.373
MUE2008LOEW1	PRJNA716130	feces metagenome	43332	fecal microbiome	fecal	fecal	Germany: Munich	Panthera leo	48.10 N 11.55 E	Feloidea	Carnivore	54.0143	8.19862	481	127.74
MUE2008LOEW2	PRJNA716130	feces metagenome	43332	fecal microbiome	fecal	fecal	Germany: Munich	Panthera leo	48.10 N 11.55 E	Feloidea	Carnivore	47.6902	8.15083	460	195.234
MUE2709LOEW3	PRJNA716130	feces metagenome	43370	fecal microbiome	fecal	fecal	Germany: Munich	Panthera leo	48.10 N 11.55 E	Feloidea	Carnivore	51.7797	7.86875	461	70.784
NEU0405LOEW10	PRJNA716130	feces metagenome	43224	fecal microbiome	fecal	fecal	Germany: Neuwied	Panthera leo	50.45 N 7.57 E	Feloidea	Carnivore	32.6768	6.89912	264	85.6346
NEU0405LOEW6	PRJNA716130	feces metagenome	43224	fecal microbiome	fecal	fecal	Germany: Neuwied	Panthera leo	50.45 N 7.57 E	Feloidea	Carnivore	42.4705	7.67944	354	105.66
NEU0405LOEW7	PRJNA716130	feces metagenome	43224	fecal microbiome	fecal	fecal	Germany: Neuwied	Panthera leo	50.45 N 7.57 E	Feloidea	Carnivore	35.5666	7.47644	276	124.074
NEU0405LOEW8	PRJNA716130	feces metagenome	43224	fecal microbiome	fecal	fecal	Germany: Neuwied	Panthera leo	50.45 N 7.57 E	Feloidea	Carnivore	46.9333	7.96671	418	74.3467
NEU2704LOEW1	PRJNA716130	feces metagenome	43217	fecal microbiome	fecal	fecal	Germany: Neuwied	Panthera leo	50.45 N 7.57 E	Feloidea	Carnivore	43.9441	8.0714	464	81.3552
NEU2704LOEW2	PRJNA716130	feces metagenome	43217	fecal microbiome	fecal	fecal	Germany: Neuwied	Panthera leo	50.45 N 7.57 E	Feloidea	Carnivore	52.669	8.16267	498	43.9305
NEU2704LOEW3	PRJNA716130	feces metagenome	43217	fecal microbiome	fecal	fecal	Germany: Neuwied	Panthera leo	50.45 N 7.57 E	Feloidea	Carnivore	47.8887	8.27813	471	148.985
NEU2704LOEW4	PRJNA716130	feces metagenome	43217	fecal microbiome	fecal	fecal	Germany: Neuwied	Panthera leo	50.45 N 7.57 E	Feloidea	Carnivore	36.776	7.00238	279	40.7308
NEU2704LOEW5	PRJNA716130	feces metagenome	43217	fecal microbiome	fecal	fecal	Germany: Neuwied	Panthera leo	50.45 N 7.57 E	Feloidea	Carnivore	46.2268	7.91905	426	85.216
NEU2704LOEW6	PRJNA716130	feces metagenome	43217	fecal microbiome	fecal	fecal	Germany: Neuwied	Panthera leo	50.45 N 7.57 E	Feloidea	Carnivore	49.282	8.24462	505	111.142
NEU2704LOEW9	PRJNA716130	feces metagenome	43217	fecal microbiome	fecal	fecal	Germany: Neuwied	Panthera leo	50.45 N 7.57 E	Feloidea	Carnivore	49.798	8.25391	518	183.381
STU2006LOEW1	PRJNA716130	feces metagenome	43271	fecal microbiome	fecal	fecal	Germany: Stuttgart	Panthera leo	48.81 N 9.20 E	Feloidea	Carnivore	45.9295	7.97538	391	37.0805
STU2006LOEW2	PRJNA716130	feces metagenome	43271	fecal microbiome	fecal	fecal	Germany: Stuttgart	Panthera leo	48.81 N 9.20 E	Feloidea	Carnivore	41.5028	7.85123	365	78.049
STU2706LOEW3	PRJNA716130	feces metagenome	43278	fecal microbiome	fecal	fecal	Germany: Stuttgart	Panthera leo	48.81 N 9.20 E	Feloidea	Carnivore	30.6358	6.95836	235	107.925
STU2706LOEW4	PRJNA716130	feces metagenome	43278	fecal microbiome	fecal	fecal	Germany: Stuttgart	Panthera leo	48.81 N 9.20 E	Feloidea	Carnivore	19.1333	5.86845	96	165.043
WUP0506LOEW1	PRJNA716130	feces metagenome	43256	fecal microbiome	fecal	fecal	Germany: Wuppertal	Panthera leo	51.24 N 7.11 E	Feloidea	Carnivore	34.058	7.40451	333	67.2159
WUP1206LOEW2	PRJNA716130	feces metagenome	43263	fecal microbiome	fecal	fecal	Germany: Wuppertal	Panthera leo	51.24 N 7.11 E	Feloidea	Carnivore	33.9494	7.47513	331	72.3866
DOR0606JAGU1	PRJNA716130	feces metagenome	43257	fecal microbiome	fecal	fecal	Germany: Dortmund	Panthera onca	51.47 N 7.47 E	Feloidea	Carnivore	37.7963	7.7321	387	39.3925
DOR0606JAGU2	PRJNA716130	feces metagenome	43257	fecal microbiome	fecal	fecal	Germany: Dortmund	Panthera onca	51.47 N 7.47 E	Feloidea	Carnivore	30.8446	7.25509	269	160.801
DOR1306JAGU3	PRJNA716130	feces metagenome	43264	fecal microbiome	fecal	fecal	Germany: Dortmund	Panthera onca	51.47 N 7.47 E	Feloidea	Carnivore	28.4838	7.22003	234	66.3985
DOR1306JAGU4	PRJNA716130	feces metagenome	43264	fecal microbiome	fecal	fecal	Germany: Dortmund	Panthera onca	51.47 N 7.47 E	Feloidea	Carnivore	34.3729	7.07117	268	64.839
KRE0706JAGU1	PRJNA716130	feces metagenome	43258	fecal microbiome	fecal	fecal	Germany: Krefeld	Panthera onca	51.36 N 6.63 E	Feloidea	Carnivore	39.9869	7.45605	407	116.262
KRE0706JAGU2	PRJNA716130	feces metagenome	43258	fecal microbiome	fecal	fecal	Germany: Krefeld	Panthera onca	51.36 N 6.63 E	Feloidea	Carnivore	35.1739	7.35091	306	142.463
KRE0706JAGU3	PRJNA716130	feces metagenome	43258	fecal microbiome	fecal	fecal	Germany: Krefeld	Panthera onca	51.36 N 6.63 E	Feloidea	Carnivore	30.4959	7.08556	228	204.668
KRE0706JAGU4	PRJNA716130	feces metagenome	43258	fecal microbiome	fecal	fecal	Germany: Krefeld	Panthera onca	51.36 N 6.63 E	Feloidea	Carnivore	34.7811	7.33211	326	73.2322
KRE1406JAGU5	PRJNA716130	feces metagenome	43265	fecal microbiome	fecal	fecal	Germany: Krefeld	Panthera onca	51.36 N 6.63 E	Feloidea	Carnivore	30.0977	6.83463	222	63.4445
KRE1406JAGU6	PRJNA716130	feces metagenome	43265	fecal microbiome	fecal	fecal	Germany: Krefeld	Panthera onca	51.36 N 6.63 E	Feloidea	Carnivore	35.0225	7.54212	290	68.6506
KRE1406JAGU7	PRJNA716130	feces metagenome	43265	fecal microbiome	fecal	fecal	Germany: Krefeld	Panthera onca	51.36 N 6.63 E	Feloidea	Carnivore	29.3763	7.07936	215	39.4821
BER1505LEOP1	PRJNA716130	feces metagenome	43235	fecal microbiome	fecal	fecal	Germany: Berlin	Panthera pardus	52.50 N 13.53 E	Feloidea	Carnivore	46.1066	8.11181	459	82.2663
BER1505LEOP2	PRJNA716130	feces metagenome	43235	fecal microbiome	fecal	fecal	Germany: Berlin	Panthera pardus	52.50 N 13.53 E	Feloidea	Carnivore	44.6139	8.07909	469	110.011
BER1505LEOP3	PRJNA716130	feces metagenome	43235	fecal microbiome	fecal	fecal	Germany: Berlin	Panthera pardus	52.50 N 13.53 E	Feloidea	Carnivore	35.1129	7.53431	302	132.378
BER1505LEOP4	PRJNA716130	feces metagenome	43235	fecal microbiome	fecal	fecal	Germany: Berlin	Panthera pardus	52.50 N 13.53 E	Feloidea	Carnivore	42.3719	7.81732	370	98.6081
DOR0606LEOP1	PRJNA716130	feces metagenome	43257	fecal microbiome	fecal	fecal	Germany: Dortmund	Panthera pardus	51.47 N 7.47 E	Feloidea	Carnivore	41.9079	8.00232	410	133.888
DOR1306LEOP2	PRJNA716130	feces metagenome	43264	fecal microbiome	fecal	fecal	Germany: Dortmund	Panthera pardus	51.47 N 7.47 E	Feloidea	Carnivore	35.3678	7.50557	277	127.792
STU2006LEOP1	PRJNA716130	feces metagenome	43271	fecal microbiome	fecal	fecal	Germany: Stuttgart	Panthera pardus	48.81 N 9.20 E	Feloidea	Carnivore	36.0019	7.32648	255	13.6018
WUP0506LEOP1	PRJNA716130	feces metagenome	43256	fecal microbiome	fecal	fecal	Germany: Wuppertal	Panthera pardus	51.24 N 7.11 E	Feloidea	Carnivore	39.0418	7.23459	295	99.5397
WUP1206LEOP2	PRJNA716130	feces metagenome	43263	fecal microbiome	fecal	fecal	Germany: Wuppertal	Panthera pardus	51.24 N 7.11 E	Feloidea	Carnivore	45.2568	7.40048	392	145.247
WUP1206LEOP3	PRJNA716130	feces metagenome	43263	fecal microbiome	fecal	fecal	Germany: Wuppertal	Panthera pardus	51.24 N 7.11 E	Feloidea	Carnivore	47.5233	8.01539	456	131.636
BER0805TIGA1	PRJNA716130	feces metagenome	43228	fecal microbiome	fecal	fecal	Germany: Berlin	Panthera tigris	52.50 N 13.53 E	Feloidea	Carnivore	41.7803	7.76343	389	80.1341
BER0805TIGA2	PRJNA716130	feces metagenome	43228	fecal microbiome	fecal	fecal	Germany: Berlin	Panthera tigris	52.50 N 13.53 E	Feloidea	Carnivore	27.4952	6.68716	151	75.3923
BER0805TIGA3	PRJNA716130	feces metagenome	43228	fecal microbiome	fecal	fecal	Germany: Berlin	Panthera tigris	52.50 N 13.53 E	Feloidea	Carnivore	31.2933	6.94451	191	155.609
BER0805TIGA4	PRJNA716130	feces metagenome	43228	fecal microbiome	fecal	fecal	Germany: Berlin	Panthera tigris	52.50 N 13.53 E	Feloidea	Carnivore	44.9186	8.03719	471	145.764
BER0805TIGA5	PRJNA716130	feces metagenome	43228	fecal microbiome	fecal	fecal	Germany: Berlin	Panthera tigris	52.50 N 13.53 E	Feloidea	Carnivore	29.3252	6.63584	177	132.908
BER0805TIGA6	PRJNA716130	feces metagenome	43228	fecal microbiome	fecal	fecal	Germany: Berlin	Panthera tigris	52.50 N 13.53 E	Feloidea	Carnivore	44.9943	7.78944	360	185.495
BER0905TIGA10	PRJNA716130	feces metagenome	43229	fecal microbiome	fecal	fecal	Germany: Berlin	Panthera tigris	52.50 N 13.53 E	Feloidea	Carnivore	32.1038	7.24643	217	47.2696
BER0905TIGA11	PRJNA716130	feces metagenome	43229	fecal microbiome	fecal	fecal	Germany: Berlin	Panthera tigris	52.50 N 13.53 E	Feloidea	Carnivore	37.3697	7.53252	279	61.4409
BER0905TIGA12	PRJNA716130	feces metagenome	43229	fecal microbiome	fecal	fecal	Germany: Berlin	Panthera tigris	52.50 N 13.53 E	Feloidea	Carnivore	47.0164	7.83427	403	28.0932
BER0905TIGA13	PRJNA716130	feces metagenome	43229	fecal microbiome	fecal	fecal	Germany: Berlin	Panthera tigris	52.50 N 13.53 E	Feloidea	Carnivore	41.6571	7.69659	341	141.258
BER0905TIGA7	PRJNA716130	feces metagenome	43229	fecal microbiome	fecal	fecal	Germany: Berlin	Panthera tigris	52.50 N 13.53 E	Feloidea	Carnivore	41.0252	7.4425	314	162.299
BER0905TIGA8	PRJNA716130	feces metagenome	43229	fecal microbiome	fecal	fecal	Germany: Berlin	Panthera tigris	52.50 N 13.53 E	Feloidea	Carnivore	38.4838	7.59878	305	59.7478
BER0905TIGA9	PRJNA716130	feces metagenome	43229	fecal microbiome	fecal	fecal	Germany: Berlin	Panthera tigris	52.50 N 13.53 E	Feloidea	Carnivore	31.7654	7.02088	238	81.5541
BER1405TIGA16	PRJNA716130	feces metagenome	43234	fecal microbiome	fecal	fecal	Germany: Berlin	Panthera tigris	52.50 N 13.53 E	Feloidea	Carnivore	34.0327	6.9421	237	60.1514
BER1505TIGA17	PRJNA716130	feces metagenome	43235	fecal microbiome	fecal	fecal	Germany: Berlin	Panthera tigris	52.50 N 13.53 E	Feloidea	Carnivore	24.3855	6.50531	140	67.5698
BER1505TIGA18	PRJNA716130	feces metagenome	43235	fecal microbiome	fecal	fecal	Germany: Berlin	Panthera tigris	52.50 N 13.53 E	Feloidea	Carnivore	41.9905	7.61667	357	164.384
BER1505TIGA19	PRJNA716130	feces metagenome	43235	fecal microbiome	fecal	fecal	Germany: Berlin	Panthera tigris	52.50 N 13.53 E	Feloidea	Carnivore	32.439	7.16057	225	103.721
BER1505TIGA20	PRJNA716130	feces metagenome	43235	fecal microbiome	fecal	fecal	Germany: Berlin	Panthera tigris	52.50 N 13.53 E	Feloidea	Carnivore	47.4647	7.54851	453	98.9721
BERXXXXTIGA14	PRJNA716130	feces metagenome	43235	fecal microbiome	fecal	fecal	Germany: Berlin	Panthera tigris	52.50 N 13.53 E	Feloidea	Carnivore	46.8608	7.64819	441	135.919
BERXXXXTIGA15	PRJNA716130	feces metagenome	43235	fecal microbiome	fecal	fecal	Germany: Berlin	Panthera tigris	52.50 N 13.53 E	Feloidea	Carnivore	31.8123	5.95802	232	80.9474
DUI0406TIGA1	PRJNA716130	feces metagenome	43255	fecal microbiome	fecal	fecal	Germany: Duisburg	Panthera tigris	51.44 N 6.80 E	Feloidea	Carnivore	36.8099	6.23737	270	85.5074
DUI0406TIGA2	PRJNA716130	feces metagenome	43255	fecal microbiome	fecal	fecal	Germany: Duisburg	Panthera tigris	51.44 N 6.80 E	Feloidea	Carnivore	40.0346	6.84418	297	57.8345
DUI0406TIGA3	PRJNA716130	feces metagenome	43255	fecal microbiome	fecal	fecal	Germany: Duisburg	Panthera tigris	51.44 N 6.80 E	Feloidea	Carnivore	28.6131	5.73373	166	82.9401
DUI1106TIGA4	PRJNA716130	feces metagenome	43384	fecal microbiome	fecal	fecal	Germany: Duisburg	Panthera tigris	51.44 N 6.80 E	Feloidea	Carnivore	31.9092	6.79405	188	134.149
DUI1106TIGA5	PRJNA716130	feces metagenome	43384	fecal microbiome	fecal	fecal	Germany: Duisburg	Panthera tigris	51.44 N 6.80 E	Feloidea	Carnivore	29.6053	6.77699	171	70.5916
FRA0207TIGA11	PRJNA716130	feces metagenome	43283	fecal microbiome	fecal	fecal	Germany: Frankfurt	Panthera tigris	50.11 N 8.70 E	Feloidea	Carnivore	36.1203	7.49511	287	99.0714
FRA2506TIGA1	PRJNA716130	feces metagenome	43276	fecal microbiome	fecal	fecal	Germany: Frankfurt	Panthera tigris	50.11 N 8.70 E	Feloidea	Carnivore	34.4816	7.43056	296	116.5
FRA2506TIGA2	PRJNA716130	feces metagenome	43276	fecal microbiome	fecal	fecal	Germany: Frankfurt	Panthera tigris	50.11 N 8.70 E	Feloidea	Carnivore	34.8967	7.32139	274	89.2003
FRA2606TIGA3	PRJNA716130	feces metagenome	43277	fecal microbiome	fecal	fecal	Germany: Frankfurt	Panthera tigris	50.11 N 8.70 E	Feloidea	Carnivore	4.85643	2.34737	24	48.7614
FRA2606TIGA4	PRJNA716130	feces metagenome	43277	fecal microbiome	fecal	fecal	Germany: Frankfurt	Panthera tigris	50.11 N 8.70 E	Feloidea	Carnivore	9.74717	3.955	60	73.5461
FRA2706TIGA5	PRJNA716130	feces metagenome	43278	fecal microbiome	fecal	fecal	Germany: Frankfurt	Panthera tigris	50.11 N 8.70 E	Feloidea	Carnivore	5.12428	3.60176	32	49.0028
FRA2706TIGA6	PRJNA716130	feces metagenome	43278	fecal microbiome	fecal	fecal	Germany: Frankfurt	Panthera tigris	50.11 N 8.70 E	Feloidea	Carnivore	8.03	3.72704	44	63.0842
FRA2806TIGA7	PRJNA716130	feces metagenome	43279	fecal microbiome	fecal	fecal	Germany: Frankfurt	Panthera tigris	50.11 N 8.70 E	Feloidea	Carnivore	7.39841	4.05629	54	93.6942
FRA2806TIGA8	PRJNA716130	feces metagenome	43279	fecal microbiome	fecal	fecal	Germany: Frankfurt	Panthera tigris	50.11 N 8.70 E	Feloidea	Carnivore	7.86379	4.55591	66	132.08
FRA2906TIGA10	PRJNA716130	feces metagenome	43280	fecal microbiome	fecal	fecal	Germany: Frankfurt	Panthera tigris	50.11 N 8.70 E	Feloidea	Carnivore	7.1679	4.14402	42	94.5979
FRA2906TIGA9	PRJNA716130	feces metagenome	43280	fecal microbiome	fecal	fecal	Germany: Frankfurt	Panthera tigris	50.11 N 8.70 E	Feloidea	Carnivore	9.01472	4.78224	75	197.941
HEI0107TIGA	PRJNA716130	feces metagenome	43647	fecal microbiome	fecal	fecal	Germany: Heidelberg	Panthera tigris	49.41 N 8.67 E	Feloidea	Carnivore	6.71702	3.31012	42	63.8576
HEI0208TIGRW	PRJNA716130	feces metagenome	43679	fecal microbiome	fecal	fecal	Germany: Heidelberg	Panthera tigris	49.41 N 8.67 E	Feloidea	Carnivore	7.38693	4.71093	61	66.6048
HEI0209TIGA	PRJNA716130	feces metagenome	43710	fecal microbiome	fecal	fecal	Germany: Heidelberg	Panthera tigris	49.41 N 8.67 E	Feloidea	Carnivore	7.40204	4.75129	60	209.339
HEI1206TIGA1	PRJNA716130	feces metagenome	43628	fecal microbiome	fecal	fecal	Germany: Heidelberg	Panthera tigris	49.41 N 8.67 E	Feloidea	Carnivore	6.41512	3.397	58	92.9014
HEI1206TIGA2	PRJNA716130	feces metagenome	43628	fecal microbiome	fecal	fecal	Germany: Heidelberg	Panthera tigris	49.41 N 8.67 E	Feloidea	Carnivore	7.69576	2.47864	43	157.163
HEI1907TIGA	PRJNA716130	feces metagenome	43665	fecal microbiome	fecal	fecal	Germany: Heidelberg	Panthera tigris	49.41 N 8.67 E	Feloidea	Carnivore	6.32703	4.13486	43	156.839
HEI1908TIGA	PRJNA716130	feces metagenome	43696	fecal microbiome	fecal	fecal	Germany: Heidelberg	Panthera tigris	49.41 N 8.67 E	Feloidea	Carnivore	6.38796	4.28403	49	8.00087
LAN0305TIGA2	PRJNA716130	feces metagenome	43223	fecal microbiome	fecal	fecal	Germany: Landau	Panthera tigris	49.20 N 8.11 E	Feloidea	Carnivore	5.41849	3.94613	32	112.813
LAN2604TIGA1	PRJNA716130	feces metagenome	43216	fecal microbiome	fecal	fecal	Germany: Landau	Panthera tigris	49.20 N 8.11 E	Feloidea	Carnivore	11.6269	5.81408	105	102.222
MUE2108TIGA1	PRJNA716130	feces metagenome	43333	fecal microbiome	fecal	fecal	Germany: Munich	Panthera tigris	48.10 N 11.55 E	Feloidea	Carnivore	4.702	2.98156	24	78.7245
NEU2704TIGA1	PRJNA716130	feces metagenome	43217	fecal microbiome	fecal	fecal	Germany: Neuwied	Panthera tigris	50.45 N 7.57 E	Feloidea	Carnivore	5.44339	1.90528	22	95.3081
STU2006TIGA1	PRJNA716130	feces metagenome	43271	fecal microbiome	fecal	fecal	Germany: Stuttgart	Panthera tigris	48.81 N 9.20 E	Feloidea	Carnivore	2.85572	3.20789	18	116.838
STU2706TIGA2	PRJNA716130	feces metagenome	43278	fecal microbiome	fecal	fecal	Germany: Stuttgart	Panthera tigris	48.81 N 9.20 E	Feloidea	Carnivore	4.4081	3.52207	34	169.261
WUP0506TIGA1	PRJNA716130	feces metagenome	43256	fecal microbiome	fecal	fecal	Germany: Wuppertal	Panthera tigris	51.24 N 7.11 E	Feloidea	Carnivore	3.83897	3.63115	34	74.8248
WUP1206TIGA2	PRJNA716130	feces metagenome	43263	fecal microbiome	fecal	fecal	Germany: Wuppertal	Panthera tigris	51.24 N 7.11 E	Feloidea	Carnivore	5.3639	3.8479	44	59.2945
BER0805SEEL1	PRJNA716130	feces metagenome	43228	fecal microbiome	fecal	fecal	Germany: Berlin	Panthera uncia	52.50 N 13.53 E	Feloidea	Carnivore	6.81182	4.5797	56	78.9149
BER0805SEEL2	PRJNA716130	feces metagenome	43228	fecal microbiome	fecal	fecal	Germany: Berlin	Panthera uncia	52.50 N 13.53 E	Feloidea	Carnivore	10.56	4.1464	63	99.4937
BER1505SEEL3	PRJNA716130	feces metagenome	43235	fecal microbiome	fecal	fecal	Germany: Berlin	Panthera uncia	52.50 N 13.53 E	Feloidea	Carnivore	11.0794	3.91715	76	67.9909
KRE0706SEEL1	PRJNA716130	feces metagenome	43258	fecal microbiome	fecal	fecal	Germany: Krefeld	Panthera uncia	51.36 N 6.63 E	Feloidea	Carnivore	7.77369	3.89892	44	174.792
KRE0706SEEL2	PRJNA716130	feces metagenome	43258	fecal microbiome	fecal	fecal	Germany: Krefeld	Panthera uncia	51.36 N 6.63 E	Feloidea	Carnivore	12.6391	5.41764	121	78.645
KRE0706SEEL3	PRJNA716130	feces metagenome	43258	fecal microbiome	fecal	fecal	Germany: Krefeld	Panthera uncia	51.36 N 6.63 E	Feloidea	Carnivore	4.47419	3.27777	24	154.223
KRE0706SEEL4	PRJNA716130	feces metagenome	43258	fecal microbiome	fecal	fecal	Germany: Krefeld	Panthera uncia	51.36 N 6.63 E	Feloidea	Carnivore	9.85654	4.4456	54	101.062
KRE1406SEEL5	PRJNA716130	feces metagenome	43265	fecal microbiome	fecal	fecal	Germany: Krefeld	Panthera uncia	51.36 N 6.63 E	Feloidea	Carnivore	4.02131	1.64465	21	521.74
KRE1406SEEL6	PRJNA716130	feces metagenome	43265	fecal microbiome	fecal	fecal	Germany: Krefeld	Panthera uncia	51.36 N 6.63 E	Feloidea	Carnivore	7.92178	2.61911	36	173.025
WUP0506SEEL1	PRJNA716130	feces metagenome	43256	fecal microbiome	fecal	fecal	Germany: Wuppertal	Panthera uncia	51.24 N 7.11 E	Feloidea	Carnivore	5.16574	3.0963	30	128.797
WUP0506SEEL2	PRJNA716130	feces metagenome	43256	fecal microbiome	fecal	fecal	Germany: Wuppertal	Panthera uncia	51.24 N 7.11 E	Feloidea	Carnivore	7.74485	4.37273	58	22.5527
WUP0506SEEL3	PRJNA716130	feces metagenome	43256	fecal microbiome	fecal	fecal	Germany: Wuppertal	Panthera uncia	51.24 N 7.11 E	Feloidea	Carnivore	8.26037	3.73315	53	126.097
WUP0506SEEL4	PRJNA716130	feces metagenome	43256	fecal microbiome	fecal	fecal	Germany: Wuppertal	Panthera uncia	51.24 N 7.11 E	Feloidea	Carnivore	9.2368	4.77118	65	45.1201
WUP0506SEEL5	PRJNA716130	feces metagenome	43256	fecal microbiome	fecal	fecal	Germany: Wuppertal	Panthera uncia	51.24 N 7.11 E	Feloidea	Carnivore	5.22599	3.24848	24	39.977
WUP0506SEEL6	PRJNA716130	feces metagenome	43256	fecal microbiome	fecal	fecal	Germany: Wuppertal	Panthera uncia	51.24 N 7.11 E	Feloidea	Carnivore	8.1489	4.7786	66	46.7387
WUP1206SEEL10	PRJNA716130	feces metagenome	43263	fecal microbiome	fecal	fecal	Germany: Wuppertal	Panthera uncia	51.24 N 7.11 E	Feloidea	Carnivore	10.6739	5.05537	84	67.0474
WUP1206SEEL7	PRJNA716130	feces metagenome	43263	fecal microbiome	fecal	fecal	Germany: Wuppertal	Panthera uncia	51.24 N 7.11 E	Feloidea	Carnivore	28.6556	6.98883	213	97.6762
WUP1206SEEL8	PRJNA716130	feces metagenome	43263	fecal microbiome	fecal	fecal	Germany: Wuppertal	Panthera uncia	51.24 N 7.11 E	Feloidea	Carnivore	39.3049	7.74192	355	45.9095
WUP1206SEEL9	PRJNA716130	feces metagenome	43263	fecal microbiome	fecal	fecal	Germany: Wuppertal	Panthera uncia	51.24 N 7.11 E	Feloidea	Carnivore	33.9582	6.99452	260	127.722
BEZ2505ERDM1	PRJNA716130	feces metagenome	43976	fecal microbiome	fecal	fecal	Germany: Berlin	Suricata suricatta	52.51 N 13.34 E	Feloidea	Carnivore	15.8322	5.40494	129	39.6255
BEZ2505ERDM2	PRJNA716130	feces metagenome	43976	fecal microbiome	fecal	fecal	Germany: Berlin	Suricata suricatta	52.51 N 13.34 E	Feloidea	Carnivore	15.5119	5.79031	115	10.9247
BEZ2605ERDM1	PRJNA716130	feces metagenome	43977	fecal microbiome	fecal	fecal	Germany: Berlin	Suricata suricatta	52.51 N 13.34 E	Feloidea	Carnivore	15.6547	5.76293	138	640.407
BEZ2605ERDM2	PRJNA716130	feces metagenome	43977	fecal microbiome	fecal	fecal	Germany: Berlin	Suricata suricatta	52.51 N 13.34 E	Feloidea	Carnivore	16.0664	5.69278	132	312.732
GEL0910ERDM1	PRJNA716130	feces metagenome	43747	fecal microbiome	fecal	fecal	Germany: Gelsenkirchen	Suricata suricatta	51.54 N 7.11 E	Feloidea	Carnivore	10.8085	4.40681	77	165.521
GEL0910ERDM2	PRJNA716130	feces metagenome	43747	fecal microbiome	fecal	fecal	Germany: Gelsenkirchen	Suricata suricatta	51.54 N 7.11 E	Feloidea	Carnivore	18.7781	6.08957	135	268.448
GEL0910ERDM3	PRJNA716130	feces metagenome	43747	fecal microbiome	fecal	fecal	Germany: Gelsenkirchen	Suricata suricatta	51.54 N 7.11 E	Feloidea	Carnivore	16.1102	5.68203	125	231.877
HEI1103ERD	PRJNA716130	feces metagenome	43901	fecal microbiome	fecal	fecal	Germany: Heidelberg	Suricata suricatta	49.41 N 8.67 E	Feloidea	Carnivore	10.855	4.32271	67	426.535
HEI1203ERD	PRJNA716130	feces metagenome	43902	fecal microbiome	fecal	fecal	Germany: Heidelberg	Suricata suricatta	49.41 N 8.67 E	Feloidea	Carnivore	9.71977	4.95058	52	147.806
KLN1905ERDM1	PRJNA716130	feces metagenome	43970	fecal microbiome	fecal	fecal	Germany: Cologne	Suricata suricatta	50.95 N 6.91 E	Feloidea	Carnivore	7.64218	4.09013	43	22.4483
KLN1905ERDM2	PRJNA716130	feces metagenome	43970	fecal microbiome	fecal	fecal	Germany: Cologne	Suricata suricatta	50.95 N 6.91 E	Feloidea	Carnivore	12.1187	4.40127	77	30.8148
KLN2005ERDM1	PRJNA716130	feces metagenome	43971	fecal microbiome	fecal	fecal	Germany: Cologne	Suricata suricatta	50.95 N 6.91 E	Feloidea	Carnivore	10.4294	5.10221	71	41.9377
KLN2005ERDM2	PRJNA716130	feces metagenome	43971	fecal microbiome	fecal	fecal	Germany: Cologne	Suricata suricatta	50.95 N 6.91 E	Feloidea	Carnivore	9.12373	4.91206	57	31.0955
OPE0603ERDM1	PRJNA716130	feces metagenome	43896	fecal microbiome	fecal	fecal	Germany: Kronberg	Suricata suricatta	50.18 N 8.49 E	Feloidea	Carnivore	9.25779	4.88966	59	222.504
OPE0603ERDM2	PRJNA716130	feces metagenome	43896	fecal microbiome	fecal	fecal	Germany: Kronberg	Suricata suricatta	50.18 N 8.49 E	Feloidea	Carnivore	9.07666	4.64171	61	327.115
OPE0603ERDM3	PRJNA716130	feces metagenome	43896	fecal microbiome	fecal	fecal	Germany: Kronberg	Suricata suricatta	50.18 N 8.49 E	Feloidea	Carnivore	10.6581	4.3837	58	318.279
SCH2805ERDM1	PRJNA716130	feces metagenome	43979	fecal microbiome	fecal	fecal	Germany: Schwerin	Suricata suricatta	53.61 N 11.43 E	Feloidea	Carnivore	7.10581	3.33553	25	296.717
SCH2805ERDM2	PRJNA716130	feces metagenome	43979	fecal microbiome	fecal	fecal	Germany: Schwerin	Suricata suricatta	53.61 N 11.43 E	Feloidea	Carnivore	10.4693	5.08944	68	82.0077
SCH2805ERDM3	PRJNA716130	feces metagenome	43979	fecal microbiome	fecal	fecal	Germany: Schwerin	Suricata suricatta	53.61 N 11.43 E	Feloidea	Carnivore	8.49086	4.09687	54	441.232
SCH2905ERDM	PRJNA716130	feces metagenome	43980	fecal microbiome	fecal	fecal	Germany: Schwerin	Suricata suricatta	53.61 N 11.43 E	Feloidea	Carnivore	9.58136	4.21316	65	293.545
OPE2507PAND3	PRJNA716130	feces metagenome	43306	fecal microbiome	fecal	fecal	Germany: Kronberg	Ailurus fulgens	50.18 N 8.49 E	Perissodactyla	Herbivore	25.35	5.57844	112	225.347
OPE2507PAND4	PRJNA716130	feces metagenome	43306	fecal microbiome	fecal	fecal	Germany: Kronberg	Ailurus fulgens	50.18 N 8.49 E	Perissodactyla	Herbivore	37.4335	6.55545	246	26.5165
WUP0506PAND1	PRJNA716130	feces metagenome	43256	fecal microbiome	fecal	fecal	Germany: Wuppertal	Ailurus fulgens	51.24 N 7.11 E	Perissodactyla	Herbivore	33.2537	6.52897	245	118.058
WUP0506PAND2	PRJNA716130	feces metagenome	43256	fecal microbiome	fecal	fecal	Germany: Wuppertal	Ailurus fulgens	51.24 N 7.11 E	Perissodactyla	Herbivore	20.3344	3.52576	98	25.7512
WUP1206PAND3	PRJNA716130	feces metagenome	43263	fecal microbiome	fecal	fecal	Germany: Wuppertal	Ailurus fulgens	51.24 N 7.11 E	Perissodactyla	Herbivore	36.7783	7.3777	287	118.937
WUP1206PAND4	PRJNA716130	feces metagenome	43263	fecal microbiome	fecal	fecal	Germany: Wuppertal	Ailurus fulgens	51.24 N 7.11 E	Perissodactyla	Herbivore	32.1005	5.95316	208	156.862
DOR2702NASH1	PRJNA716130	feces metagenome	44009	fecal microbiome	fecal	fecal	Germany: Dortmund	Ceratotherium simum	51.47 N 7.47 E	Perissodactyla	Herbivore	4.15115	3.43004	31	727.441
DOR2702NASH2	PRJNA716130	feces metagenome	44009	fecal microbiome	fecal	fecal	Germany: Dortmund	Ceratotherium simum	51.47 N 7.47 E	Perissodactyla	Herbivore	4.73614	4.01491	38	794.75
DOR2702NASH3	PRJNA716130	feces metagenome	44009	fecal microbiome	fecal	fecal	Germany: Dortmund	Ceratotherium simum	51.47 N 7.47 E	Perissodactyla	Herbivore	4.16053	3.77125	30	416.331
DOR2702NASH4	PRJNA716130	feces metagenome	44009	fecal microbiome	fecal	fecal	Germany: Dortmund	Ceratotherium simum	51.47 N 7.47 E	Perissodactyla	Herbivore	3.76861	3.75315	28	1136.15
DUI1010NASH1	PRJNA716130	feces metagenome	43748	fecal microbiome	fecal	fecal	Germany: Duisburg	Ceratotherium simum	51.44 N 6.80 E	Perissodactyla	Herbivore	4.92674	4.5004	68	1210.53
DUI1607NASH	PRJNA716130	feces metagenome	43662	fecal microbiome	fecal	fecal	Germany: Duisburg	Ceratotherium simum	51.44 N 6.80 E	Perissodactyla	Herbivore	5.61405	2.90083	39	1056.19
GEL0910NASH1	PRJNA716130	feces metagenome	43747	fecal microbiome	fecal	fecal	Germany: Gelsenkirchen	Ceratotherium simum	51.54 N 7.11 E	Perissodactyla	Herbivore	4.45382	4.20652	32	1275.9
GEL0910NASH2	PRJNA716130	feces metagenome	43747	fecal microbiome	fecal	fecal	Germany: Gelsenkirchen	Ceratotherium simum	51.54 N 7.11 E	Perissodactyla	Herbivore	6.49439	3.11454	44	1036.4
GEL1707NASH1	PRJNA716130	feces metagenome	43663	fecal microbiome	fecal	fecal	Germany: Gelsenkirchen	Ceratotherium simum	51.54 N 7.11 E	Perissodactyla	Herbivore	5.01651	3.28608	30	1609.79
GEL1707NASH2	PRJNA716130	feces metagenome	43663	fecal microbiome	fecal	fecal	Germany: Gelsenkirchen	Ceratotherium simum	51.54 N 7.11 E	Perissodactyla	Herbivore	5.50005	4.07589	37	990.338
GEL1707NASH3	PRJNA716130	feces metagenome	43663	fecal microbiome	fecal	fecal	Germany: Gelsenkirchen	Ceratotherium simum	51.54 N 7.11 E	Perissodactyla	Herbivore	4.9881	3.89061	38	1337.46
SCH2905NASH	PRJNA716130	feces metagenome	43980	fecal microbiome	fecal	fecal	Germany: Schwerin	Ceratotherium simum	53.61 N 11.43 E	Perissodactyla	Herbivore	6.37688	4.2596	45	1881.51
SCH2905NASH1	PRJNA716130	feces metagenome	43980	fecal microbiome	fecal	fecal	Germany: Schwerin	Ceratotherium simum	53.61 N 11.43 E	Perissodactyla	Herbivore	6.15512	5.07575	67	1597.22
BEZ0603NASH1	PRJNA716130	feces metagenome	43896	fecal microbiome	fecal	fecal	Germany: Berlin	Diceros bicornis	52.51 N 13.34 E	Perissodactyla	Herbivore	9.15019	4.78095	57	264.66
BEZ2505NASH1	PRJNA716130	feces metagenome	43976	fecal microbiome	fecal	fecal	Germany: Berlin	Diceros bicornis	52.51 N 13.34 E	Perissodactyla	Herbivore	9.99973	4.6877	59	33.9797
BEZ2505NASH2	PRJNA716130	feces metagenome	43976	fecal microbiome	fecal	fecal	Germany: Berlin	Diceros bicornis	52.51 N 13.34 E	Perissodactyla	Herbivore	10.2374	4.70119	65	703.066
BEZ2605NASH1	PRJNA716130	feces metagenome	43977	fecal microbiome	fecal	fecal	Germany: Berlin	Diceros bicornis	52.51 N 13.34 E	Perissodactyla	Herbivore	6.96409	3.53181	43	1599.9
BEZ2605NASH2	PRJNA716130	feces metagenome	43977	fecal microbiome	fecal	fecal	Germany: Berlin	Diceros bicornis	52.51 N 13.34 E	Perissodactyla	Herbivore	12.7642	4.2122	66	684.694
FRA0507NASH	PRJNA716130	feces metagenome	43651	fecal microbiome	fecal	fecal	Germany: Frankfurt	Diceros bicornis	50.11 N 8.70 E	Perissodactyla	Herbivore	10.9443	5.0743	70	398.043
KLN1707NASH	PRJNA716130	feces metagenome	43663	fecal microbiome	fecal	fecal	Germany: Cologne	Diceros bicornis	50.95 N 6.91 E	Perissodactyla	Herbivore	9.91429	4.06009	36	1082.47
KLN1905NASH1	PRJNA716130	feces metagenome	43970	fecal microbiome	fecal	fecal	Germany: Cologne	Diceros bicornis	50.95 N 6.91 E	Perissodactyla	Herbivore	10.8539	4.97808	50	384.967
KLN2005NASH1	PRJNA716130	feces metagenome	43971	fecal microbiome	fecal	fecal	Germany: Cologne	Diceros bicornis	50.95 N 6.91 E	Perissodactyla	Herbivore	8.05235	4.53351	46	494.556
KLN2005NASH2	PRJNA716130	feces metagenome	43971	fecal microbiome	fecal	fecal	Germany: Cologne	Diceros bicornis	50.95 N 6.91 E	Perissodactyla	Herbivore	9.19568	4.75415	57	530.464
LEI2602NASH1	PRJNA716130	feces metagenome	43887	fecal microbiome	fecal	fecal	Germany: Leipzig	Diceros bicornis	51.35 N 12.37 E	Perissodactyla	Herbivore	11.797	5.56311	89	1331.04
LEI2602NASH2	PRJNA716130	feces metagenome	43887	fecal microbiome	fecal	fecal	Germany: Leipzig	Diceros bicornis	51.35 N 12.37 E	Perissodactyla	Herbivore	7.80862	4.75781	40	639.042
BER0403ZEBR1	PRJNA716130	feces metagenome	43894	fecal microbiome	fecal	fecal	Germany: Berlin	Equus grevyi	52.50 N 13.53 E	Perissodactyla	Herbivore	9.71923	4.63778	60	1984.84
BER0403ZEBR2	PRJNA716130	feces metagenome	43894	fecal microbiome	fecal	fecal	Germany: Berlin	Equus grevyi	52.50 N 13.53 E	Perissodactyla	Herbivore	12.57	4.70908	65	2851.83
BER0403ZEBR3	PRJNA716130	feces metagenome	43894	fecal microbiome	fecal	fecal	Germany: Berlin	Equus grevyi	52.50 N 13.53 E	Perissodactyla	Herbivore	10.3024	5.32399	77	2091.34
BER0503ZEBR6	PRJNA716130	feces metagenome	43895	fecal microbiome	fecal	fecal	Germany: Berlin	Equus grevyi	52.50 N 13.53 E	Perissodactyla	Herbivore	10.7925	5.1649	67	1439.56
BER0503ZEBR7	PRJNA716130	feces metagenome	43895	fecal microbiome	fecal	fecal	Germany: Berlin	Equus grevyi	52.50 N 13.53 E	Perissodactyla	Herbivore	9.40629	4.56486	62	3129.21
BER0503ZEBR8	PRJNA716130	feces metagenome	43895	fecal microbiome	fecal	fecal	Germany: Berlin	Equus grevyi	52.50 N 13.53 E	Perissodactyla	Herbivore	13.1128	4.75705	64	3422.82
BER0603ZEBR6	PRJNA716130	feces metagenome	43896	fecal microbiome	fecal	fecal	Germany: Berlin	Equus grevyi	52.50 N 13.53 E	Perissodactyla	Herbivore	38.8742	7.79577	365	2785.27
BER0603ZEBR7	PRJNA716130	feces metagenome	43896	fecal microbiome	fecal	fecal	Germany: Berlin	Equus grevyi	52.50 N 13.53 E	Perissodactyla	Herbivore	30.597	7.29084	253	2888.67
BER0603ZEBR8	PRJNA716130	feces metagenome	43896	fecal microbiome	fecal	fecal	Germany: Berlin	Equus grevyi	52.50 N 13.53 E	Perissodactyla	Herbivore	28.917	7.08662	207	3589.46
BEZ0603ZEBR1	PRJNA716130	feces metagenome	43896	fecal microbiome	fecal	fecal	Germany: Berlin	Equus grevyi	52.51 N 13.34 E	Perissodactyla	Herbivore	19.8955	6.1926	105	2898.28
BEZ0603ZEBR2	PRJNA716130	feces metagenome	43896	fecal microbiome	fecal	fecal	Germany: Berlin	Equus grevyi	52.51 N 13.34 E	Perissodactyla	Herbivore	28.8919	6.86608	214	844.206
BEZ0603ZEBR3	PRJNA716130	feces metagenome	43896	fecal microbiome	fecal	fecal	Germany: Berlin	Equus grevyi	52.51 N 13.34 E	Perissodactyla	Herbivore	28.6615	6.68799	205	2939.29
FRA1411ZEBR1	PRJNA716130	feces metagenome	43418	fecal microbiome	fecal	fecal	Germany: Frankfurt	Equus grevyi	50.11 N 8.70 E	Perissodactyla	Herbivore	13.6232	5.01074	66	1333.36
FRA1411ZEBR2	PRJNA716130	feces metagenome	43418	fecal microbiome	fecal	fecal	Germany: Frankfurt	Equus grevyi	50.11 N 8.70 E	Perissodactyla	Herbivore	15.589	4.75091	74	1309.07
KLN1805ZEBR1	PRJNA716130	feces metagenome	43969	fecal microbiome	fecal	fecal	Germany: Cologne	Equus grevyi	50.95 N 6.91 E	Perissodactyla	Herbivore	25.6916	6.46702	168	277.271
KLN1805ZEBR2	PRJNA716130	feces metagenome	43969	fecal microbiome	fecal	fecal	Germany: Cologne	Equus grevyi	50.95 N 6.91 E	Perissodactyla	Herbivore	24.2165	5.86362	194	513.088
KLN1805ZEBR3	PRJNA716130	feces metagenome	43969	fecal microbiome	fecal	fecal	Germany: Cologne	Equus grevyi	50.95 N 6.91 E	Perissodactyla	Herbivore	31.5173	6.10688	280	192.638
KLN1905ZEBR1	PRJNA716130	feces metagenome	43970	fecal microbiome	fecal	fecal	Germany: Cologne	Equus grevyi	50.95 N 6.91 E	Perissodactyla	Herbivore	27.4353	6.14127	216	703.122
KLN1905ZEBR2	PRJNA716130	feces metagenome	43970	fecal microbiome	fecal	fecal	Germany: Cologne	Equus grevyi	50.95 N 6.91 E	Perissodactyla	Herbivore	38.4745	7.67671	365	255.053
LEI2602ZEBR	PRJNA716130	feces metagenome	43887	fecal microbiome	fecal	fecal	Germany: Leipzig	Equus grevyi	51.35 N 12.37 E	Perissodactyla	Herbivore	25.109	5.87598	195	2425.14
BER0403ZEBR4	PRJNA716130	feces metagenome	43894	fecal microbiome	fecal	fecal	Germany: Berlin	Equus quagga	52.50 N 13.53 E	Perissodactyla	Herbivore	32.4098	7.32646	241	1520.03
BER0403ZEBR5	PRJNA716130	feces metagenome	43894	fecal microbiome	fecal	fecal	Germany: Berlin	Equus quagga	52.50 N 13.53 E	Perissodactyla	Herbivore	32.436	7.39783	247	2483.23
BER0403ZEBR6	PRJNA716130	feces metagenome	43894	fecal microbiome	fecal	fecal	Germany: Berlin	Equus quagga	52.50 N 13.53 E	Perissodactyla	Herbivore	35.0605	7.57599	304	1037.44
BER0403ZEBR7	PRJNA716130	feces metagenome	43894	fecal microbiome	fecal	fecal	Germany: Berlin	Equus quagga	52.50 N 13.53 E	Perissodactyla	Herbivore	29.801	7.33982	256	3333.61
BER0403ZEBR8	PRJNA716130	feces metagenome	43894	fecal microbiome	fecal	fecal	Germany: Berlin	Equus quagga	52.50 N 13.53 E	Perissodactyla	Herbivore	29.0443	7.17109	234	3027.18
BER0503ZEBR1	PRJNA716130	feces metagenome	43895	fecal microbiome	fecal	fecal	Germany: Berlin	Equus quagga	52.50 N 13.53 E	Perissodactyla	Herbivore	22.4585	6.48087	120	3226.29
BER0503ZEBR2	PRJNA716130	feces metagenome	43895	fecal microbiome	fecal	fecal	Germany: Berlin	Equus quagga	52.50 N 13.53 E	Perissodactyla	Herbivore	21.121	6.37315	107	3093.9
BER0503ZEBR3	PRJNA716130	feces metagenome	43895	fecal microbiome	fecal	fecal	Germany: Berlin	Equus quagga	52.50 N 13.53 E	Perissodactyla	Herbivore	21.2035	6.39789	121	2352.96
BER0503ZEBR3-a	PRJNA716130	feces metagenome	43895	fecal microbiome	fecal	fecal	Germany: Berlin	Equus quagga	52.50 N 13.53 E	Perissodactyla	Herbivore	36.5987	7.60894	346	1386.58
BER0503ZEBR4	PRJNA716130	feces metagenome	43895	fecal microbiome	fecal	fecal	Germany: Berlin	Equus quagga	52.50 N 13.53 E	Perissodactyla	Herbivore	11.5705	4.91169	84	2987.87
BER0603ZEBR1	PRJNA716130	feces metagenome	43896	fecal microbiome	fecal	fecal	Germany: Berlin	Equus quagga	52.50 N 13.53 E	Perissodactyla	Herbivore	12.906	5.02071	90	802.044
BER0603ZEBR2	PRJNA716130	feces metagenome	43896	fecal microbiome	fecal	fecal	Germany: Berlin	Equus quagga	52.50 N 13.53 E	Perissodactyla	Herbivore	13.6628	5.38344	96	1871.16
BER0603ZEBR3	PRJNA716130	feces metagenome	43896	fecal microbiome	fecal	fecal	Germany: Berlin	Equus quagga	52.50 N 13.53 E	Perissodactyla	Herbivore	14.5877	4.83399	95	1818.14
BER0603ZEBR4	PRJNA716130	feces metagenome	43896	fecal microbiome	fecal	fecal	Germany: Berlin	Equus quagga	52.50 N 13.53 E	Perissodactyla	Herbivore	13.5745	5.02552	92	1636.77
BER0603ZEBR5	PRJNA716130	feces metagenome	43896	fecal microbiome	fecal	fecal	Germany: Berlin	Equus quagga	52.50 N 13.53 E	Perissodactyla	Herbivore	11.5241	4.87486	79	761.918
BEZ0603ZEBR4	PRJNA716130	feces metagenome	43896	fecal microbiome	fecal	fecal	Germany: Berlin	Equus quagga	52.51 N 13.34 E	Perissodactyla	Herbivore	15.6682	5.48752	107	2414.96
BEZ0603ZEBR5	PRJNA716130	feces metagenome	43896	fecal microbiome	fecal	fecal	Germany: Berlin	Equus quagga	52.51 N 13.34 E	Perissodactyla	Herbivore	14.1065	5.04143	95	1403.09
BEZ0603ZEBR6	PRJNA716130	feces metagenome	43896	fecal microbiome	fecal	fecal	Germany: Berlin	Equus quagga	52.51 N 13.34 E	Perissodactyla	Herbivore	13.4158	5.26579	91	1867.81
DOR1607ZEBR1	PRJNA716130	feces metagenome	43632	fecal microbiome	fecal	fecal	Germany: Dortmund	Equus quagga	51.47 N 7.47 E	Perissodactyla	Herbivore	12.9532	5.26843	88	1995.76
DOR1607ZEBR2	PRJNA716130	feces metagenome	43632	fecal microbiome	fecal	fecal	Germany: Dortmund	Equus quagga	51.47 N 7.47 E	Perissodactyla	Herbivore	13.775	5.24416	100	1119.77
DOR1607ZEBR3	PRJNA716130	feces metagenome	43632	fecal microbiome	fecal	fecal	Germany: Dortmund	Equus quagga	51.47 N 7.47 E	Perissodactyla	Herbivore	14.1032	5.40133	106	1034.94
DOR2702ZEBR1	PRJNA716130	feces metagenome	44009	fecal microbiome	fecal	fecal	Germany: Dortmund	Equus quagga	51.47 N 7.47 E	Perissodactyla	Herbivore	14.3801	5.48082	116	2525.68
DOR2702ZEBR2	PRJNA716130	feces metagenome	44009	fecal microbiome	fecal	fecal	Germany: Dortmund	Equus quagga	51.47 N 7.47 E	Perissodactyla	Herbivore	15.9016	5.49555	71	2200.84
DOR2702ZEBR3	PRJNA716130	feces metagenome	44009	fecal microbiome	fecal	fecal	Germany: Dortmund	Equus quagga	51.47 N 7.47 E	Perissodactyla	Herbivore	14.3433	5.6297	73	1707.01
HEI2002ZEBR1	PRJNA716130	feces metagenome	43881	fecal microbiome	fecal	fecal	Germany: Heidelberg	Equus quagga	49.41 N 8.67 E	Perissodactyla	Herbivore	18.0299	5.46577	120	668.68
HEI2002ZEBR2	PRJNA716130	feces metagenome	43881	fecal microbiome	fecal	fecal	Germany: Heidelberg	Equus quagga	49.41 N 8.67 E	Perissodactyla	Herbivore	12.3734	5.38882	87	2031.78
HEI2002ZEBR3	PRJNA716130	feces metagenome	43881	fecal microbiome	fecal	fecal	Germany: Heidelberg	Equus quagga	49.41 N 8.67 E	Perissodactyla	Herbivore	16.0164	5.66339	96	1287.65
OPE0506ZEBR	PRJNA716130	feces metagenome	43987	fecal microbiome	fecal	fecal	Germany: Kronberg	Equus quagga	50.18 N 8.49 E	Perissodactyla	Herbivore	16.6848	5.9718	109	1897.91
OPE1006ZEBR	PRJNA716130	feces metagenome	43992	fecal microbiome	fecal	fecal	Germany: Kronberg	Equus quagga	50.18 N 8.49 E	Perissodactyla	Herbivore	14.6804	5.84695	100	2096.85
OPE1606ZEBR	PRJNA716130	feces metagenome	43998	fecal microbiome	fecal	fecal	Germany: Kronberg	Equus quagga	50.18 N 8.49 E	Perissodactyla	Herbivore	7.98121	3.80508	53	386.842
OPE1706ZEBR	PRJNA716130	feces metagenome	43999	fecal microbiome	fecal	fecal	Germany: Kronberg	Equus quagga	50.18 N 8.49 E	Perissodactyla	Herbivore	11.4451	4.21515	57	511.512
OPE1806ZEBR	PRJNA716130	feces metagenome	44000	fecal microbiome	fecal	fecal	Germany: Kronberg	Equus quagga	50.18 N 8.49 E	Perissodactyla	Herbivore	10.8177	4.69083	66	938.401
OPE1906ZEBR	PRJNA716130	feces metagenome	44001	fecal microbiome	fecal	fecal	Germany: Kronberg	Equus quagga	50.18 N 8.49 E	Perissodactyla	Herbivore	15.3533	5.09458	126	309.12
OPE2709ZEBR1	PRJNA716130	feces metagenome	43370	fecal microbiome	fecal	fecal	Germany: Kronberg	Equus quagga	50.18 N 8.49 E	Perissodactyla	Herbivore	7.39838	3.85145	56	892.523
OPE2709ZEBR2	PRJNA716130	feces metagenome	43370	fecal microbiome	fecal	fecal	Germany: Kronberg	Equus quagga	50.18 N 8.49 E	Perissodactyla	Herbivore	13.7642	4.86556	86	877.421
WUP1507ZEBR1	PRJNA716130	feces metagenome	43661	fecal microbiome	fecal	fecal	Germany: Wuppertal	Equus quagga	51.24 N 7.11 E	Perissodactyla	Herbivore	9.89762	4.48906	69	1799.22
WUP1507ZEBR2	PRJNA716130	feces metagenome	43661	fecal microbiome	fecal	fecal	Germany: Wuppertal	Equus quagga	51.24 N 7.11 E	Perissodactyla	Herbivore	10.1168	4.47361	75	1686.76
WUP1507ZEBR3	PRJNA716130	feces metagenome	43661	fecal microbiome	fecal	fecal	Germany: Wuppertal	Equus quagga	51.24 N 7.11 E	Perissodactyla	Herbivore	10.1026	5.23125	91	1512.3
BE0503ZEBR5	PRJNA716130	feces metagenome	43895	fecal microbiome	fecal	fecal	Germany: Berlin	Equus zebra	52.50 N 13.53 E	Perissodactyla	Herbivore	33.5664	7.10757	269	3645.96
LAN0108ZEBR1	PRJNA716130	feces metagenome	44044	fecal microbiome	fecal	fecal	Germany: Landau	Equus zebra	49.20 N 8.11 E	Perissodactyla	Herbivore	32.2253	6.88854	236	1099.24
LAN0108ZEBR2	PRJNA716130	feces metagenome	44044	fecal microbiome	fecal	fecal	Germany: Landau	Equus zebra	49.20 N 8.11 E	Perissodactyla	Herbivore	33.0138	7.24113	282	2749.17
LAN0208ZEBR1	PRJNA716130	feces metagenome	44045	fecal microbiome	fecal	fecal	Germany: Landau	Equus zebra	49.20 N 8.11 E	Perissodactyla	Herbivore	38.4493	7.56805	307	3807.09
LAN0208ZEBR2	PRJNA716130	feces metagenome	44045	fecal microbiome	fecal	fecal	Germany: Landau	Equus zebra	49.20 N 8.11 E	Perissodactyla	Herbivore	40.1421	7.89747	365	3842.61
LAN0308ZEBR1	PRJNA716130	feces metagenome	44046	fecal microbiome	fecal	fecal	Germany: Landau	Equus zebra	49.20 N 8.11 E	Perissodactyla	Herbivore	37.3584	7.68042	369	2908.47
LAN0308ZEBR2	PRJNA716130	feces metagenome	44046	fecal microbiome	fecal	fecal	Germany: Landau	Equus zebra	49.20 N 8.11 E	Perissodactyla	Herbivore	40.3426	7.85175	337	2568.9
LAN2707ZEBR1	PRJNA716130	feces metagenome	44039	fecal microbiome	fecal	fecal	Germany: Landau	Equus zebra	49.20 N 8.11 E	Perissodactyla	Herbivore	33.7131	7.49672	275	3635.91
LAN2707ZEBR2	PRJNA716130	feces metagenome	44039	fecal microbiome	fecal	fecal	Germany: Landau	Equus zebra	49.20 N 8.11 E	Perissodactyla	Herbivore	34.1798	7.41835	266	3466.26
LAN2807ZEBR1	PRJNA716130	feces metagenome	44040	fecal microbiome	fecal	fecal	Germany: Landau	Equus zebra	49.20 N 8.11 E	Perissodactyla	Herbivore	41.9488	7.70145	374	2614.29
LAN2807ZEBR2	PRJNA716130	feces metagenome	44040	fecal microbiome	fecal	fecal	Germany: Landau	Equus zebra	49.20 N 8.11 E	Perissodactyla	Herbivore	22.2201	6.23543	111	991.404
LAN2907ZEBR1	PRJNA716130	feces metagenome	44041	fecal microbiome	fecal	fecal	Germany: Landau	Equus zebra	49.20 N 8.11 E	Perissodactyla	Herbivore	21.6885	6.52004	124	2163.41
LAN2907ZEBR2	PRJNA716130	feces metagenome	44041	fecal microbiome	fecal	fecal	Germany: Landau	Equus zebra	49.20 N 8.11 E	Perissodactyla	Herbivore	28.9063	6.84275	204	1765.95
LAN3007ZEBR1	PRJNA716130	feces metagenome	44042	fecal microbiome	fecal	fecal	Germany: Landau	Equus zebra	49.20 N 8.11 E	Perissodactyla	Herbivore	37.2396	7.48691	300	2883.34
LAN3007ZEBR2	PRJNA716130	feces metagenome	44042	fecal microbiome	fecal	fecal	Germany: Landau	Equus zebra	49.20 N 8.11 E	Perissodactyla	Herbivore	34.1328	7.48257	282	3201.57
LAN3107ZEBR1	PRJNA716130	feces metagenome	44043	fecal microbiome	fecal	fecal	Germany: Landau	Equus zebra	49.20 N 8.11 E	Perissodactyla	Herbivore	27.1909	6.81578	191	3507.53
LAN3107ZEBR2	PRJNA716130	feces metagenome	44043	fecal microbiome	fecal	fecal	Germany: Landau	Equus zebra	49.20 N 8.11 E	Perissodactyla	Herbivore	41.2868	7.59554	351	3936.82
FRA0507GIRA2	PRJNA716130	feces metagenome	43651	fecal microbiome	fecal	fecal	Germany: Frankfurt	Giraffa camelopardalis	50.11 N 8.70 E	Perissodactyla	Herbivore	44.4538	7.64556	354	1784.52
FRA1411GIRA1	PRJNA716130	feces metagenome	43418	fecal microbiome	fecal	fecal	Germany: Frankfurt	Giraffa camelopardalis	50.11 N 8.70 E	Perissodactyla	Herbivore	47.8416	8.13822	462	912.125
FRA1411GIRA2	PRJNA716130	feces metagenome	43418	fecal microbiome	fecal	fecal	Germany: Frankfurt	Giraffa camelopardalis	50.11 N 8.70 E	Perissodactyla	Herbivore	51.1595	8.18576	472	1989.3
GEL1707GIRA1	PRJNA716130	feces metagenome	43663	fecal microbiome	fecal	fecal	Germany: Gelsenkirchen	Giraffa camelopardalis	51.54 N 7.11 E	Perissodactyla	Herbivore	42.3675	7.59329	316	1027.76
GEL1707GIRA2	PRJNA716130	feces metagenome	43663	fecal microbiome	fecal	fecal	Germany: Gelsenkirchen	Giraffa camelopardalis	51.54 N 7.11 E	Perissodactyla	Herbivore	33.304	7.27209	240	1448.97
GEL1707GIRA3	PRJNA716130	feces metagenome	43663	fecal microbiome	fecal	fecal	Germany: Gelsenkirchen	Giraffa camelopardalis	51.54 N 7.11 E	Perissodactyla	Herbivore	46.3814	7.9321	423	1494.37
GEL1707GIRA4	PRJNA716130	feces metagenome	43663	fecal microbiome	fecal	fecal	Germany: Gelsenkirchen	Giraffa camelopardalis	51.54 N 7.11 E	Perissodactyla	Herbivore	42.694	7.95571	383	899.05
GEL1707GIRA5	PRJNA716130	feces metagenome	43663	fecal microbiome	fecal	fecal	Germany: Gelsenkirchen	Giraffa camelopardalis	51.54 N 7.11 E	Perissodactyla	Herbivore	47.1897	8.04854	461	1270.9
GEL1707GIRA6	PRJNA716130	feces metagenome	43663	fecal microbiome	fecal	fecal	Germany: Gelsenkirchen	Giraffa camelopardalis	51.54 N 7.11 E	Perissodactyla	Herbivore	44.5847	7.96855	415	1126.96
GEL1707GIRA7	PRJNA716130	feces metagenome	43663	fecal microbiome	fecal	fecal	Germany: Gelsenkirchen	Giraffa camelopardalis	51.54 N 7.11 E	Perissodactyla	Herbivore	44.5197	7.97187	398	1137.38
GEL1707GIRA8	PRJNA716130	feces metagenome	43663	fecal microbiome	fecal	fecal	Germany: Gelsenkirchen	Giraffa camelopardalis	51.54 N 7.11 E	Perissodactyla	Herbivore	25.1341	6.7384	151	1532.5
KLN1707GIRA1	PRJNA716130	feces metagenome	43663	fecal microbiome	fecal	fecal	Germany: Cologne	Giraffa camelopardalis	50.95 N 6.91 E	Perissodactyla	Herbivore	44.8469	7.98592	402	1395.67
KLN1707GIRA2	PRJNA716130	feces metagenome	43663	fecal microbiome	fecal	fecal	Germany: Cologne	Giraffa camelopardalis	50.95 N 6.91 E	Perissodactyla	Herbivore	34.0279	5.625	247	1935.36
KLN1707GIRA3	PRJNA716130	feces metagenome	43663	fecal microbiome	fecal	fecal	Germany: Cologne	Giraffa camelopardalis	50.95 N 6.91 E	Perissodactyla	Herbivore	33.2468	6.24045	237	2690.48
KLN1707GIRA4	PRJNA716130	feces metagenome	43663	fecal microbiome	fecal	fecal	Germany: Cologne	Giraffa camelopardalis	50.95 N 6.91 E	Perissodactyla	Herbivore	31.27	5.26081	224	2165.53
OPE2709GIRA1	PRJNA716130	feces metagenome	43370	fecal microbiome	fecal	fecal	Germany: Kronberg	Giraffa camelopardalis	50.18 N 8.49 E	Perissodactyla	Herbivore	36.5329	6.55553	316	1940.24
DUI1607TAPI1	PRJNA716130	feces metagenome	43662	fecal microbiome	fecal	fecal	Germany: Duisburg	Tapirus terrestris	51.44 N 6.80 E	Perissodactyla	Herbivore	10.3439	4.3938	62	807.446
DUI1607TAPI2	PRJNA716130	feces metagenome	43662	fecal microbiome	fecal	fecal	Germany: Duisburg	Tapirus terrestris	51.44 N 6.80 E	Perissodactyla	Herbivore	9.96467	5.22303	80	799.808
KLN1707TAPI	PRJNA716130	feces metagenome	43663	fecal microbiome	fecal	fecal	Germany: Cologne	Tapirus terrestris	50.95 N 6.91 E	Perissodactyla	Herbivore	11.0945	4.59484	75	1262.73
NEU1507TAP1	PRJNA716130	feces metagenome	43661	fecal microbiome	fecal	fecal	Germany: Neuwied	Tapirus terrestris	50.45 N 7.57 E	Perissodactyla	Herbivore	10.843	5.04735	69	568.011
NEU1908TAPI	PRJNA716130	feces metagenome	43696	fecal microbiome	fecal	fecal	Germany: Neuwied	Tapirus terrestris	50.45 N 7.57 E	Perissodactyla	Herbivore	10.3573	4.98199	66	623.752
BEZ2505TUSI1	PRJNA716130	feces metagenome	43976	fecal microbiome	fecal	fecal	Germany: Berlin	Bos taurus	52.51 N 13.34 E	Ruminantia	Herbivore	33.547	6.20366	224	332.632
BEZ2505TUSI2	PRJNA716130	feces metagenome	43976	fecal microbiome	fecal	fecal	Germany: Berlin	Bos taurus	52.51 N 13.34 E	Ruminantia	Herbivore	33.2985	6.27375	226	1977.88
BEZ2505TUSI3	PRJNA716130	feces metagenome	43976	fecal microbiome	fecal	fecal	Germany: Berlin	Bos taurus	52.51 N 13.34 E	Ruminantia	Herbivore	35.649	6.987	233	949.335
BEZ2605TUSI1	PRJNA716130	feces metagenome	43977	fecal microbiome	fecal	fecal	Germany: Berlin	Bos taurus	52.51 N 13.34 E	Ruminantia	Herbivore	28.8133	5.98656	177	1857.8
BEZ2605TUSI2	PRJNA716130	feces metagenome	43977	fecal microbiome	fecal	fecal	Germany: Berlin	Bos taurus	52.51 N 13.34 E	Ruminantia	Herbivore	41.8184	7.19372	271	520.647
DUI0811TUSI1	PRJNA716130	feces metagenome	43412	fecal microbiome	fecal	fecal	Germany: Duisburg	Bos taurus	51.44 N 6.80 E	Ruminantia	Herbivore	29.0426	6.45997	151	1806.6
DUI0811TUSI2	PRJNA716130	feces metagenome	43412	fecal microbiome	fecal	fecal	Germany: Duisburg	Bos taurus	51.44 N 6.80 E	Ruminantia	Herbivore	35.7296	7.84077	355	1172.65
DUI0811TUSI3	PRJNA716130	feces metagenome	43412	fecal microbiome	fecal	fecal	Germany: Duisburg	Bos taurus	51.44 N 6.80 E	Ruminantia	Herbivore	31.4548	7.32229	256	654.386
NEU1507TUSI1	PRJNA716130	feces metagenome	43661	fecal microbiome	fecal	fecal	Germany: Neuwied	Bos taurus	50.45 N 7.57 E	Ruminantia	Herbivore	44.8429	8.37205	547	1521.83
NEU1507TUSI2	PRJNA716130	feces metagenome	43661	fecal microbiome	fecal	fecal	Germany: Neuwied	Bos taurus	50.45 N 7.57 E	Ruminantia	Herbivore	34.4254	7.52688	356	2428.36
NEU1507TUSI3	PRJNA716130	feces metagenome	43661	fecal microbiome	fecal	fecal	Germany: Neuwied	Bos taurus	50.45 N 7.57 E	Ruminantia	Herbivore	35.1494	7.33928	326	619.805
NEU1609TUSI1	PRJNA716130	feces metagenome	43724	fecal microbiome	fecal	fecal	Germany: Neuwied	Bos taurus	50.45 N 7.57 E	Ruminantia	Herbivore	32.8324	7.37604	294	2216.76
NEU1609TUSI2	PRJNA716130	feces metagenome	43724	fecal microbiome	fecal	fecal	Germany: Neuwied	Bos taurus	50.45 N 7.57 E	Ruminantia	Herbivore	31.1898	7.2288	285	1610.57
NEU1908TUSI	PRJNA716130	feces metagenome	43696	fecal microbiome	fecal	fecal	Germany: Neuwied	Bos taurus	50.45 N 7.57 E	Ruminantia	Herbivore	4.11174	3.12288	26	1524.49
NEU2810TUSI	PRJNA716130	feces metagenome	43493	fecal microbiome	fecal	fecal	Germany: Neuwied	Bos taurus	50.45 N 7.57 E	Ruminantia	Herbivore	4.78809	3.31877	28	663.325
LAN0108GNUS1	PRJNA716130	feces metagenome	44044	fecal microbiome	fecal	fecal	Germany: Landau	Connochaetes taurinus	49.20 N 8.11 E	Ruminantia	Herbivore	4.46142	3.72578	41	2705.81
LAN0108GNUS2	PRJNA716130	feces metagenome	44044	fecal microbiome	fecal	fecal	Germany: Landau	Connochaetes taurinus	49.20 N 8.11 E	Ruminantia	Herbivore	13.0149	4.62247	66	1356.24
LAN0108GNUS3	PRJNA716130	feces metagenome	44044	fecal microbiome	fecal	fecal	Germany: Landau	Connochaetes taurinus	49.20 N 8.11 E	Ruminantia	Herbivore	9.60926	4.63674	57	2029.15
LAN0208GNUS1	PRJNA716130	feces metagenome	44045	fecal microbiome	fecal	fecal	Germany: Landau	Connochaetes taurinus	49.20 N 8.11 E	Ruminantia	Herbivore	9.52357	4.49298	52	2230.33
LAN0208GNUS2	PRJNA716130	feces metagenome	44045	fecal microbiome	fecal	fecal	Germany: Landau	Connochaetes taurinus	49.20 N 8.11 E	Ruminantia	Herbivore	12.7368	5.39926	90	917.873
LAN0208GNUS3	PRJNA716130	feces metagenome	44045	fecal microbiome	fecal	fecal	Germany: Landau	Connochaetes taurinus	49.20 N 8.11 E	Ruminantia	Herbivore	11.7434	5.2322	91	1530.78
LAN0308GNUS1	PRJNA716130	feces metagenome	44046	fecal microbiome	fecal	fecal	Germany: Landau	Connochaetes taurinus	49.20 N 8.11 E	Ruminantia	Herbivore	9.76001	4.40693	61	1595.03
LAN0308GNUS2	PRJNA716130	feces metagenome	44046	fecal microbiome	fecal	fecal	Germany: Landau	Connochaetes taurinus	49.20 N 8.11 E	Ruminantia	Herbivore	10.0979	3.72706	65	1977.68
LAN0308GNUS3	PRJNA716130	feces metagenome	44046	fecal microbiome	fecal	fecal	Germany: Landau	Connochaetes taurinus	49.20 N 8.11 E	Ruminantia	Herbivore	8.69426	4.60446	51	950.683
LAN0606GNUS1	PRJNA716130	feces metagenome	43622	fecal microbiome	fecal	fecal	Germany: Landau	Connochaetes taurinus	49.20 N 8.11 E	Ruminantia	Herbivore	9.72561	3.86714	53	3150.03
LAN0606GNUS2	PRJNA716130	feces metagenome	43622	fecal microbiome	fecal	fecal	Germany: Landau	Connochaetes taurinus	49.20 N 8.11 E	Ruminantia	Herbivore	12.8186	4.50023	81	2003.49
LAN0606GNUS3	PRJNA716130	feces metagenome	43622	fecal microbiome	fecal	fecal	Germany: Landau	Connochaetes taurinus	49.20 N 8.11 E	Ruminantia	Herbivore	11.9316	5.35704	93	1952.34
LAN0606GNUS4	PRJNA716130	feces metagenome	43622	fecal microbiome	fecal	fecal	Germany: Landau	Connochaetes taurinus	49.20 N 8.11 E	Ruminantia	Herbivore	12.0323	5.05798	93	1670.13
LAN2707GNUS1	PRJNA716130	feces metagenome	44039	fecal microbiome	fecal	fecal	Germany: Landau	Connochaetes taurinus	49.20 N 8.11 E	Ruminantia	Herbivore	9.76555	4.80687	70	1641.43
LAN2707GNUS2	PRJNA716130	feces metagenome	44039	fecal microbiome	fecal	fecal	Germany: Landau	Connochaetes taurinus	49.20 N 8.11 E	Ruminantia	Herbivore	10.2979	4.74152	73	1150.4
LAN2707GNUS3	PRJNA716130	feces metagenome	44039	fecal microbiome	fecal	fecal	Germany: Landau	Connochaetes taurinus	49.20 N 8.11 E	Ruminantia	Herbivore	9.12713	3.70694	52	1385.84
LAN2807GNUS1	PRJNA716130	feces metagenome	44040	fecal microbiome	fecal	fecal	Germany: Landau	Connochaetes taurinus	49.20 N 8.11 E	Ruminantia	Herbivore	11.5767	4.84642	94	941.962
LAN2807GNUS2	PRJNA716130	feces metagenome	44040	fecal microbiome	fecal	fecal	Germany: Landau	Connochaetes taurinus	49.20 N 8.11 E	Ruminantia	Herbivore	9.62508	3.28451	50	1448
LAN2807GNUS3	PRJNA716130	feces metagenome	44040	fecal microbiome	fecal	fecal	Germany: Landau	Connochaetes taurinus	49.20 N 8.11 E	Ruminantia	Herbivore	8.32688	4.06968	60	1050.96
LAN2907GNUS1	PRJNA716130	feces metagenome	44041	fecal microbiome	fecal	fecal	Germany: Landau	Connochaetes taurinus	49.20 N 8.11 E	Ruminantia	Herbivore	14.4258	4.90358	75	1477.65
LAN2907GNUS2	PRJNA716130	feces metagenome	44041	fecal microbiome	fecal	fecal	Germany: Landau	Connochaetes taurinus	49.20 N 8.11 E	Ruminantia	Herbivore	9.95149	4.64575	57	1100.05
LAN2907GNUS3	PRJNA716130	feces metagenome	44041	fecal microbiome	fecal	fecal	Germany: Landau	Connochaetes taurinus	49.20 N 8.11 E	Ruminantia	Herbivore	8.84121	3.97357	52	1717.87
LAN3007GNUS1	PRJNA716130	feces metagenome	44042	fecal microbiome	fecal	fecal	Germany: Landau	Connochaetes taurinus	49.20 N 8.11 E	Ruminantia	Herbivore	10.2872	4.41698	54	1216.57
LAN3007GNUS2	PRJNA716130	feces metagenome	44042	fecal microbiome	fecal	fecal	Germany: Landau	Connochaetes taurinus	49.20 N 8.11 E	Ruminantia	Herbivore	9.81319	4.8967	72	1265.53
LAN3007GNUS3	PRJNA716130	feces metagenome	44042	fecal microbiome	fecal	fecal	Germany: Landau	Connochaetes taurinus	49.20 N 8.11 E	Ruminantia	Herbivore	7.57974	3.16379	34	1959.66
LAN3107GNUS1	PRJNA716130	feces metagenome	44043	fecal microbiome	fecal	fecal	Germany: Landau	Connochaetes taurinus	49.20 N 8.11 E	Ruminantia	Herbivore	6.14768	3.68023	26	1866.64
LAN3107GNUS2	PRJNA716130	feces metagenome	44043	fecal microbiome	fecal	fecal	Germany: Landau	Connochaetes taurinus	49.20 N 8.11 E	Ruminantia	Herbivore	8.93676	3.82418	50	1421.61
LAN3107GNUS3	PRJNA716130	feces metagenome	44043	fecal microbiome	fecal	fecal	Germany: Landau	Connochaetes taurinus	49.20 N 8.11 E	Ruminantia	Herbivore	8.08101	4.36828	50	2402.48
NEU1507GNUS1	PRJNA716130	feces metagenome	43661	fecal microbiome	fecal	fecal	Germany: Neuwied	Connochaetes taurinus	50.45 N 7.57 E	Ruminantia	Herbivore	8.58012	3.63556	57	958.982
OPE0906GNU1	PRJNA716130	feces metagenome	43991	fecal microbiome	fecal	fecal	Germany: Kronberg	Connochaetes taurinus	50.18 N 8.49 E	Ruminantia	Herbivore	8.31368	3.44557	44	1026.19
OPE0906GNU2	PRJNA716130	feces metagenome	43991	fecal microbiome	fecal	fecal	Germany: Kronberg	Connochaetes taurinus	50.18 N 8.49 E	Ruminantia	Herbivore	8.2735	4.29249	55	637.923
OPE1006GNU1	PRJNA716130	feces metagenome	43992	fecal microbiome	fecal	fecal	Germany: Kronberg	Connochaetes taurinus	50.18 N 8.49 E	Ruminantia	Herbivore	9.21885	3.16299	54	578.921
OPE1006GNU2	PRJNA716130	feces metagenome	43992	fecal microbiome	fecal	fecal	Germany: Kronberg	Connochaetes taurinus	50.18 N 8.49 E	Ruminantia	Herbivore	10.0469	4.89569	76	363.889
OPE1606GNU1	PRJNA716130	feces metagenome	43998	fecal microbiome	fecal	fecal	Germany: Kronberg	Connochaetes taurinus	50.18 N 8.49 E	Ruminantia	Herbivore	9.59731	4.87224	50	441.319
OPE1606GNU2	PRJNA716130	feces metagenome	43998	fecal microbiome	fecal	fecal	Germany: Kronberg	Connochaetes taurinus	50.18 N 8.49 E	Ruminantia	Herbivore	9.52455	4.39019	46	888.981
OPE1706GNU1	PRJNA716130	feces metagenome	43999	fecal microbiome	fecal	fecal	Germany: Kronberg	Connochaetes taurinus	50.18 N 8.49 E	Ruminantia	Herbivore	9.98156	4.40599	57	1047.6
OPE1706GNU2	PRJNA716130	feces metagenome	43999	fecal microbiome	fecal	fecal	Germany: Kronberg	Connochaetes taurinus	50.18 N 8.49 E	Ruminantia	Herbivore	8.65986	4.99745	57	432.658
OPE1806GNU1	PRJNA716130	feces metagenome	44000	fecal microbiome	fecal	fecal	Germany: Kronberg	Connochaetes taurinus	50.18 N 8.49 E	Ruminantia	Herbivore	10.8039	5.10551	65	482.913
OPE1806GNU2	PRJNA716130	feces metagenome	44000	fecal microbiome	fecal	fecal	Germany: Kronberg	Connochaetes taurinus	50.18 N 8.49 E	Ruminantia	Herbivore	10.7048	4.8028	65	585.325
OPE1906GNU1	PRJNA716130	feces metagenome	44001	fecal microbiome	fecal	fecal	Germany: Kronberg	Connochaetes taurinus	50.18 N 8.49 E	Ruminantia	Herbivore	8.1262	4.91016	62	505.956
OPE1906GNU2	PRJNA716130	feces metagenome	44001	fecal microbiome	fecal	fecal	Germany: Kronberg	Connochaetes taurinus	50.18 N 8.49 E	Ruminantia	Herbivore	9.39001	4.83256	68	749.985
OPE2709GIRA2	PRJNA716130	feces metagenome	43370	fecal microbiome	fecal	fecal	Germany: Kronberg	Connochaetes taurinus	50.18 N 8.49 E	Ruminantia	Herbivore	10.2815	5.28368	92	1344.58
OPE2709GNUS1	PRJNA716130	feces metagenome	43370	fecal microbiome	fecal	fecal	Germany: Kronberg	Connochaetes taurinus	50.18 N 8.49 E	Ruminantia	Herbivore	13.5033	5.36389	84	1291.2
OPE2709GNUS2	PRJNA716130	feces metagenome	43370	fecal microbiome	fecal	fecal	Germany: Kronberg	Connochaetes taurinus	50.18 N 8.49 E	Ruminantia	Herbivore	8.49032	4.21399	49	385.731
BEZ0603GIRA1	PRJNA716130	feces metagenome	43896	fecal microbiome	fecal	fecal	Germany: Berlin	Giraffa camelopardalis	52.51 N 13.34 E	Ruminantia	Herbivore	29.8884	6.80134	236	1221.18
BEZ0603GIRA2	PRJNA716130	feces metagenome	43896	fecal microbiome	fecal	fecal	Germany: Berlin	Giraffa camelopardalis	52.51 N 13.34 E	Ruminantia	Herbivore	35.4295	7.27861	262	980.968
DOR1607GIRA1	PRJNA716130	feces metagenome	43632	fecal microbiome	fecal	fecal	Germany: Dortmund	Giraffa camelopardalis	51.47 N 7.47 E	Ruminantia	Herbivore	26.3296	6.93514	217	2570.22
DOR1607GIRA2	PRJNA716130	feces metagenome	43632	fecal microbiome	fecal	fecal	Germany: Dortmund	Giraffa camelopardalis	51.47 N 7.47 E	Ruminantia	Herbivore	30.4302	7.02728	225	1802.12
DOR1607GIRA3	PRJNA716130	feces metagenome	43632	fecal microbiome	fecal	fecal	Germany: Dortmund	Giraffa camelopardalis	51.47 N 7.47 E	Ruminantia	Herbivore	29.7279	7.03648	224	1666.29
DOR2702GIRA1	PRJNA716130	feces metagenome	44009	fecal microbiome	fecal	fecal	Germany: Dortmund	Giraffa camelopardalis	51.47 N 7.47 E	Ruminantia	Herbivore	34.0411	7.33466	291	2211.55
DOR2702GIRA2	PRJNA716130	feces metagenome	44009	fecal microbiome	fecal	fecal	Germany: Dortmund	Giraffa camelopardalis	51.47 N 7.47 E	Ruminantia	Herbivore	30.9078	7.30946	237	510.518
DUI0811GIRA1	PRJNA716130	feces metagenome	43412	fecal microbiome	fecal	fecal	Germany: Duisburg	Giraffa camelopardalis	51.44 N 6.80 E	Ruminantia	Herbivore	29.4011	7.14748	251	678.604
DUI0811GIRA2	PRJNA716130	feces metagenome	43412	fecal microbiome	fecal	fecal	Germany: Duisburg	Giraffa camelopardalis	51.44 N 6.80 E	Ruminantia	Herbivore	35.4576	7.20383	268	937.064
FRA0507GIRA1	PRJNA716130	feces metagenome	43651	fecal microbiome	fecal	fecal	Germany: Frankfurt	Giraffa camelopardalis	50.11 N 8.70 E	Ruminantia	Herbivore	37.6738	7.57056	330	1776.8
BEZ0603OKAP1	PRJNA716130	feces metagenome	43896	fecal microbiome	fecal	fecal	Germany: Berlin	Okapia johnstoni	52.51 N 13.34 E	Ruminantia	Herbivore	10.9418	4.64976	66	1051.9
BEZ0603OKAP2	PRJNA716130	feces metagenome	43896	fecal microbiome	fecal	fecal	Germany: Berlin	Okapia johnstoni	52.51 N 13.34 E	Ruminantia	Herbivore	12.5324	5.49048	90	353.701
FRA0507OKAP1	PRJNA716130	feces metagenome	43651	fecal microbiome	fecal	fecal	Germany: Frankfurt	Okapia johnstoni	50.11 N 8.70 E	Ruminantia	Herbivore	10.9987	4.85	68	1366.53
FRA0507OKAP2	PRJNA716130	feces metagenome	43651	fecal microbiome	fecal	fecal	Germany: Frankfurt	Okapia johnstoni	50.11 N 8.70 E	Ruminantia	Herbivore	10.3015	5.2742	73	1415.29
FRA0507OKAP3	PRJNA716130	feces metagenome	43651	fecal microbiome	fecal	fecal	Germany: Frankfurt	Okapia johnstoni	50.11 N 8.70 E	Ruminantia	Herbivore	8.53154	4.25963	40	1177.53
KLN1707OKAP1	PRJNA716130	feces metagenome	43663	fecal microbiome	fecal	fecal	Germany: Cologne	Okapia johnstoni	50.95 N 6.91 E	Ruminantia	Herbivore	9.67912	4.66022	55	1643.37
KLN1707OKAP2	PRJNA716130	feces metagenome	43663	fecal microbiome	fecal	fecal	Germany: Cologne	Okapia johnstoni	50.95 N 6.91 E	Ruminantia	Herbivore	10.0722	5.00384	72	1763.63
KLN1707OKAP3	PRJNA716130	feces metagenome	43663	fecal microbiome	fecal	fecal	Germany: Cologne	Okapia johnstoni	50.95 N 6.91 E	Ruminantia	Herbivore	8.8991	3.70698	48	2280.38
LEI2602OKAP1	PRJNA716130	feces metagenome	43887	fecal microbiome	fecal	fecal	Germany: Leipzig	Okapia johnstoni	51.35 N 12.37 E	Ruminantia	Herbivore	9.11835	4.39883	49	1730.31
LEI2602OKAP2	PRJNA716130	feces metagenome	43887	fecal microbiome	fecal	fecal	Germany: Leipzig	Okapia johnstoni	51.35 N 12.37 E	Ruminantia	Herbivore	9.37625	4.82088	63	1557.62
WUP1507OKAP1	PRJNA716130	feces metagenome	43661	fecal microbiome	fecal	fecal	Germany: Wuppertal	Okapia johnstoni	51.24 N 7.11 E	Ruminantia	Herbivore	8.15545	4.30874	40	1194.59
WUP1507OKAP2	PRJNA716130	feces metagenome	43661	fecal microbiome	fecal	fecal	Germany: Wuppertal	Okapia johnstoni	51.24 N 7.11 E	Ruminantia	Herbivore	9.17707	5.21157	68	1528.6
WUP1507OKAP3	PRJNA716130	feces metagenome	43661	fecal microbiome	fecal	fecal	Germany: Wuppertal	Okapia johnstoni	51.24 N 7.11 E	Ruminantia	Herbivore	8.85634	4.71081	51	929.484
WUP1507OKAP4	PRJNA716130	feces metagenome	43661	fecal microbiome	fecal	fecal	Germany: Wuppertal	Okapia johnstoni	51.24 N 7.11 E	Ruminantia	Herbivore	10.8072	4.45009	59	1885.83
WUP1507OKAP5	PRJNA716130	feces metagenome	43661	fecal microbiome	fecal	fecal	Germany: Wuppertal	Okapia johnstoni	51.24 N 7.11 E	Ruminantia	Herbivore	8.05567	3.78261	44	1187.2
DUI1010RENT1	PRJNA716130	feces metagenome	43748	fecal microbiome	fecal	fecal	Germany: Duisburg	Rangifer tarandus	51.44 N 6.80 E	Ruminantia	Herbivore	31.366	6.58896	213	1084.45
GEL0910RENT1	PRJNA716130	feces metagenome	43747	fecal microbiome	fecal	fecal	Germany: Gelsenkirchen	Rangifer tarandus	51.54 N 7.11 E	Ruminantia	Herbivore	23.7909	5.98443	170	2302.89
GEL0910RENT2	PRJNA716130	feces metagenome	43747	fecal microbiome	fecal	fecal	Germany: Gelsenkirchen	Rangifer tarandus	51.54 N 7.11 E	Ruminantia	Herbivore	28.0213	7.07931	241	1090.64
GEL0910RENT3	PRJNA716130	feces metagenome	43747	fecal microbiome	fecal	fecal	Germany: Gelsenkirchen	Rangifer tarandus	51.54 N 7.11 E	Ruminantia	Herbivore	11.1877	4.36837	68	727.028
OPE2809RENT1	PRJNA716130	feces metagenome	43371	fecal microbiome	fecal	fecal	Germany: Kronberg	Rangifer tarandus	50.18 N 8.49 E	Ruminantia	Herbivore	10.0796	4.60009	62	397.196
OPE2809RENT2	PRJNA716130	feces metagenome	43371	fecal microbiome	fecal	fecal	Germany: Kronberg	Rangifer tarandus	50.18 N 8.49 E	Ruminantia	Herbivore	9.65072	4.21937	48	1187.15
BEZ0603ELEN1	PRJNA716130	feces metagenome	43896	fecal microbiome	fecal	fecal	Germany: Berlin	Taurotragus oryx	52.51 N 13.34 E	Ruminantia	Herbivore	7.80115	3.85587	48	2430.3
BEZ0603ELEN2	PRJNA716130	feces metagenome	43896	fecal microbiome	fecal	fecal	Germany: Berlin	Taurotragus oryx	52.51 N 13.34 E	Ruminantia	Herbivore	7.32484	4.11808	47	1466.81
BEZ0603ELEN3	PRJNA716130	feces metagenome	43896	fecal microbiome	fecal	fecal	Germany: Berlin	Taurotragus oryx	52.51 N 13.34 E	Ruminantia	Herbivore	7.53156	4.05759	40	1195.86
BEZ0603ELEN4	PRJNA716130	feces metagenome	43896	fecal microbiome	fecal	fecal	Germany: Berlin	Taurotragus oryx	52.51 N 13.34 E	Ruminantia	Herbivore	8.89865	4.4486	38	489.116
BEZ0603ELEN5	PRJNA716130	feces metagenome	43896	fecal microbiome	fecal	fecal	Germany: Berlin	Taurotragus oryx	52.51 N 13.34 E	Ruminantia	Herbivore	11.717	4.41812	64	959.178
BEZ2505ELEN1	PRJNA716130	feces metagenome	43976	fecal microbiome	fecal	fecal	Germany: Berlin	Taurotragus oryx	52.51 N 13.34 E	Ruminantia	Herbivore	11.3241	4.89895	70	802.707
BEZ2505ELEN2	PRJNA716130	feces metagenome	43976	fecal microbiome	fecal	fecal	Germany: Berlin	Taurotragus oryx	52.51 N 13.34 E	Ruminantia	Herbivore	8.96179	4.25691	47	150.015
BEZ2505ELEN3	PRJNA716130	feces metagenome	43976	fecal microbiome	fecal	fecal	Germany: Berlin	Taurotragus oryx	52.51 N 13.34 E	Ruminantia	Herbivore	12.8404	4.75789	73	115.69
BEZ2505ELEN4	PRJNA716130	feces metagenome	43976	fecal microbiome	fecal	fecal	Germany: Berlin	Taurotragus oryx	52.51 N 13.34 E	Ruminantia	Herbivore	7.98517	3.88694	49	643.564
BEZ2605ELEN1	PRJNA716130	feces metagenome	43977	fecal microbiome	fecal	fecal	Germany: Berlin	Taurotragus oryx	52.51 N 13.34 E	Ruminantia	Herbivore	8.29989	3.89188	44	351.995
BEZ2605ELEN2	PRJNA716130	feces metagenome	43977	fecal microbiome	fecal	fecal	Germany: Berlin	Taurotragus oryx	52.51 N 13.34 E	Ruminantia	Herbivore	10.0729	4.54004	71	448.937
BEZ2605ELEN3	PRJNA716130	feces metagenome	43977	fecal microbiome	fecal	fecal	Germany: Berlin	Taurotragus oryx	52.51 N 13.34 E	Ruminantia	Herbivore	14.7559	5.28797	95	464.645
BEZ2605ELEN4	PRJNA716130	feces metagenome	43977	fecal microbiome	fecal	fecal	Germany: Berlin	Taurotragus oryx	52.51 N 13.34 E	Ruminantia	Herbivore	9.00317	4.59584	57	2157.51
BEZ2605ELEN5	PRJNA716130	feces metagenome	43977	fecal microbiome	fecal	fecal	Germany: Berlin	Taurotragus oryx	52.51 N 13.34 E	Ruminantia	Herbivore	9.36935	4.49088	60	356.375
DOR1607ELEN1	PRJNA716130	feces metagenome	43632	fecal microbiome	fecal	fecal	Germany: Dortmund	Taurotragus oryx	51.47 N 7.47 E	Ruminantia	Herbivore	9.46358	4.29791	56	1520
DOR1607ELEN2	PRJNA716130	feces metagenome	43632	fecal microbiome	fecal	fecal	Germany: Dortmund	Taurotragus oryx	51.47 N 7.47 E	Ruminantia	Herbivore	8.05335	4.14447	52	1632.44
DOR1607ELEN3	PRJNA716130	feces metagenome	43632	fecal microbiome	fecal	fecal	Germany: Dortmund	Taurotragus oryx	51.47 N 7.47 E	Ruminantia	Herbivore	9.76552	4.88341	65	1950.79
NUR0503ELEN1	PRJNA716130	feces metagenome	43895	fecal microbiome	fecal	fecal	Germany: Nurenberg	Taurotragus oryx	49.45 N 11.14 E	Ruminantia	Herbivore	8.82056	4.54964	57	652.538
NUR0503ELEN2	PRJNA716130	feces metagenome	43895	fecal microbiome	fecal	fecal	Germany: Nurenberg	Taurotragus oryx	49.45 N 11.14 E	Ruminantia	Herbivore	8.08292	4.15666	51	585.899
NUR0503ELEN3	PRJNA716130	feces metagenome	43895	fecal microbiome	fecal	fecal	Germany: Nurenberg	Taurotragus oryx	49.45 N 11.14 E	Ruminantia	Herbivore	10.8998	5.34396	92	600.574
NUR0503ELEN4	PRJNA716130	feces metagenome	43895	fecal microbiome	fecal	fecal	Germany: Nurenberg	Taurotragus oryx	49.45 N 11.14 E	Ruminantia	Herbivore	9.2296	4.53154	66	2016.14
OPE2809ELEN1	PRJNA716130	feces metagenome	43371	fecal microbiome	fecal	fecal	Germany: Kronberg	Taurotragus oryx	50.18 N 8.49 E	Ruminantia	Herbivore	9.05176	5.05728	70	1540.43
OPE2809ELEN2	PRJNA716130	feces metagenome	43371	fecal microbiome	fecal	fecal	Germany: Kronberg	Taurotragus oryx	50.18 N 8.49 E	Ruminantia	Herbivore	10.878	5.05522	70	1301.27
DUI0711BONG1	PRJNA716130	feces metagenome	43411	fecal microbiome	fecal	fecal	Germany: Duisburg	Tragelaphus eurycerus	51.44 N 6.80 E	Ruminantia	Herbivore	6.37064	4.19878	34	2542.17
DUI0711BONG2	PRJNA716130	feces metagenome	43412	fecal microbiome	fecal	fecal	Germany: Duisburg	Tragelaphus eurycerus	51.44 N 6.80 E	Ruminantia	Herbivore	7.13377	2.07955	42	1513.66
FRA1411BONG1	PRJNA716130	feces metagenome	43418	fecal microbiome	fecal	fecal	Germany: Frankfurt	Tragelaphus eurycerus	50.11 N 8.70 E	Ruminantia	Herbivore	8.50333	4.72573	52	4324.5
FRA1411BONG2	PRJNA716130	feces metagenome	43418	fecal microbiome	fecal	fecal	Germany: Frankfurt	Tragelaphus eurycerus	50.11 N 8.70 E	Ruminantia	Herbivore	10.3336	4.62715	60	1857.3
WUP1507BONG1	PRJNA716130	feces metagenome	43661	fecal microbiome	fecal	fecal	Germany: Wuppertal	Tragelaphus eurycerus	51.24 N 7.11 E	Ruminantia	Herbivore	10.092	4.36595	62	1539.6
WUP1507BONG2	PRJNA716130	feces metagenome	43661	fecal microbiome	fecal	fecal	Germany: Wuppertal	Tragelaphus eurycerus	51.24 N 7.11 E	Ruminantia	Herbivore	7.23986	4.55712	50	1597.25
WUP1507BONG3	PRJNA716130	feces metagenome	43661	fecal microbiome	fecal	fecal	Germany: Wuppertal	Tragelaphus eurycerus	51.24 N 7.11 E	Ruminantia	Herbivore	6.4388	4.76079	50	1378.56
